# Supplementary material for: Detection of single nucleotide polymorphisms in virus genomes assembled from high-throughput sequencing data: large-scale performance testing of sequence analysis strategies
Source: PeerJ. 2023 Aug 16;11:e15816. doi: 10.7717/peerj.15816 (PMC10439718; doi:10.7717/peerj.15816)
Supplement: Supplemental Information 2 [file peerj-11-15816-s002.xlsx]

## Sheet: Summary
	A								B
	Variant calling parameters	tool used	min coverage	min frequency	strand bias	Ploidy	average NB of Snps predicted		Manual validation parameters	method	parameter used
	A	Geneious	10	0.01	10-4 (>65%)		20		A	Visual examination
	B	CLC	100	0.01		0	16		B	Visual examination	missmapped reads
	C	Geneious	10	none	10-5 (>65%)		20		C	Visual examination	Non-sense mutation	missmapped reads
	D	Geneious	100	0.01			27		D	Visual examination	coverage	missmapped reads
	G	Geneious	none	0.05	10-5 (>65%)		11		G	none
	H	pysamstats & bcftools	none	0.005			20		H	Visual examination	covverage	average quality
	O	CLC	1000	0.01		4	22		O	metric based	frequency (10%)	quality (30)
	P	Geneious	none	0.15	10-6 (>65%)		6		P	Visual examination	coverage	missmapped reads
	Q	CLC	10	0.15		1	10		Q	none
	R	Geneious	none	0.001	10-5 (>65%)		34		R	Visual examination	missmapped reads
	S	Geneious	none	0.01	10-3 (>75%)		19		S	Visual examination	missmapped reads	quality
	T	Geneious	none	0.01	10-7 (>65%)		7		T	Visual examination	coverage	missmapped reads
	Y	CLC	10	0.35		2	2		Y	none
	Z	Geneious	100	0.05	10-5 (>70-65%)		12		Z	Visual examination	frequency	coverage

## Sheet: A
	Software used	Version tool	Database name/version	Parameter(s) used	Known key parameter(s)	Key parameter(s) identified through PT	Manual analysis	Manual criteria	Comment
Pre-process/Quality control	Geneious:	Geneious Prime® 2020.0.5 ( Build 2020-01-14 05:22 Java Version 11.0.4+11 (64 bit))	#NA		Discard short reads	None	#NA	#NA
Assembly without precise reference (de novo)	Geneious:	Geneious Prime® 2020.0.5 ( Build 2020-01-14 05:22 Java Version 11.0.4+11 (64 bit))
Closest genome sequence reference identification
Reference assembly/mapping	Geneious:	Geneious Prime® 2020.0.5 ( Build 2020-01-14 05:22 Java Version 11.0.4+11 (64 bit))
Variant (SNP) calling	Geneious Prime 2020.0.5		#NA	Minimum Coverage 10 Minimum Variant Frequency 0,01 Maximum Variant P-value: 10-6 Minimum Strand bias p-value 10-4 when exceeding 65% Merge adjacent variations		Visual examination	for validation		Visual examination is essential. Numerical values are not sufficient to exclude all possible alignment issues

## Sheet: B
	Software used	Version tool	Database name/version	Parameter(s) used	Known key parameter(s)	Key parameter(s) identified through PT	Manual analysis	Manual criteria	Comment
Pre-process/Quality control	CLC Genomics Workbench	8.5.1		Trim adapter list = Illumina Trim Adapter List Ambiguous trim = Yes Ambiguous limit = 2 Quality trim = Yes Quality limit = 0.05 Use colorspace = No Create report = Yes Also search on reversed sequence = Yes Save discarded sequences = No Remove 5' terminal nucleotides = No Discard short reads = No Remove 3' terminal nucleotides = No Discard long reads = No Save broken pairs = Yes	identify & trim adapters				As it was not known which kit was used for library preparation, a list of adapters from Illumina manual (https://support.illumina.com/bulletins/2016/12/what-sequences-do-i-use-for-adapter-trimming.html) was adopted
Assembly without precise reference (de novo)	CLC Genomics Workbench	8.5.1							de novo assembly of the 2B dataset resulted in a chimeric PepMV LE-2000-related sequence of around 9 kb. It consisted of PepMV and during de novo assembly due to polyA region a 3kb -long sequence of Solanum pennellii alpha,alpha-trehalose-phosphate synthase mRNA was appended, which was manually removed.	Dataset E
Closest genome sequence reference identification	Geneious Prime	2020.2.3 Build 2020-08-25 09:16	The nt database was created using GenBank retrieved Pepino mosaic virus nt sequences, sequence length > 5000 nt, excluding those from patents and constructs	see "B_step2; Blast_parameters;, identification of references.png" for used parameters	correct and complete database of viral isolates; proper E-Value;				two hits were discarded, see B_step2_BLAST table.xls, from datasets 1B and 3B. Their 54bp and 382bp long regions were aligned to the 5'UTR and RdRP gene regions of PepMV, respectively. As there were neary full-length PepMV hits (that covered each region), we can assume that these two regions will be sources of SNPs.
Reference assembly/mapping	CLC Genomics Workbench, tool 'Map reads to reference'	8.5.1		Masking mode = No masking Mismatch cost = 2 Cost of insertions and deletions = Linear gap cost Insertion cost = 3 Deletion cost = 3 Insertion open cost = 6 Insertion extend cost = 1 Deletion open cost = 6 Deletion extend cost = 1 Length fraction = 0.9 Similarity fraction = 0.95 Global alignment = No Non-specific match handling = Map randomly Output mode = Create stand-alone read mappings Create r…	Properly chosen values of Length & Similarity fractions
Variant (SNP) calling	CLC Genomics Workbench	8.5.1	NA	Ploidy = 0 Ignore positions with coverage above = 1,000,000 Restrict calling to target regions = Not set Ignore broken pairs = Yes Ignore non-specific matches = Reads Minimum coverage = 100 Minimum count = 10 Minimum frequency (%) = 1.0 Base quality filter = No Read direction filter = Yes Direction frequency (%) = 5.0 Relative read direction filter = Yes Significance (%) = 1.0 Read position filte…	Minimum coverage Minimum count Minimum frequency Direction frequency		Visual inspection of mappings		SNPs in regions of bad-quality mapping were discarded

## Sheet: C
	Software used	Version tool	Database name/version	Parameter(s) used	Known key parameter(s)	Key parameter(s) identified through PT	Manual analysis	Manual criteria	Comment
Pre-process/Quality control	Geneious Prime, BBDuk	38.37		java.exe -ea -Xmx8000m -cp ...\current jgi.BBDuk2 ktrimright=t k=27 hdist=1 edist=0 ref=adapters.fa qtrim=rl trimq=20 minlength=20 ordered=t qin=33 in=input1.fastq out=output1.fastq	K, hdist, edist, qtrim
Assembly without precise reference (de novo)	SPAdes	3.10.0		SPAdes-3.10.0-Windows/bin/spades.py' --rna --only-assembler --threads 4 --memory 10 --tmp-dir temp --pe1-1 pe1-1.fastq.gz --pe1-2 pe1-2.fastq.gz --phred-offset 33 -o out >stdout.txt 2>stderr.txt
Closest genome sequence reference identification	Blast		Megablast	Default settings	Max E-value= 1e-5
Reference assembly/mapping	Geneious Prime	38.37	Geneious assembler	Costum Sensitivity, extremly slow, min overlap=25, min overlap identity=99, word length=14, Index word length=12, Max mis per read=20, Max ambiguity=4					Firstly, the contigs were mapped to the candidate references. Then, For SNP calling, the reads were mapped to the candidate references.
Variant (SNP) calling	Geneious Prime	38.37	Annotate & Predict	Min coverage= 10, min variant p-value=10 -6, min strand-biass p-value=10 -5,	Min coverage= 10, min variant p-value=10 -6	Min variant frequency= unchecked

## Sheet: D
	Software used	Version tool	Database name/version	Parameter(s) used	Known key parameter(s)	Key parameter(s) identified through PT	Manual analysis	Manual criteria	Comment
Pre-process/Quality control	Geneious; BBDuk	Geneious R10; BBDuk 36.92	All Truseq, Nextera and PhiX adapters	Executing jgi.BBDukF [ktrim=r, k=27, hdist=1, edist=0, ref=adapters.fa, qtrim=rl, trimq=15, minlength=50, trimbyoverlap=t, minoverlap=24, ordered=t, qin=33, in=input1.fastq, in2=input2.fastq, out=output1.fastq, out2=output2.fastq]	Minimum quality treshold in quality trim	Minimum quality treshold balance: leaving enough reads to allow adequate read coverage, but removing enough low quality reads to omit detection of false SNPs during variant calling	Testing a set of different minimum quality values for the same datasets.	Testing minimum qualities of 10, 15, 20 and 30
Assembly without precise reference (de novo)	Geneious; Tadpole	Geneious R10; Tadpole 37.25	Not applicable	Executing assemble.Tadpole1 [k=19-49, mincontig=300, mincoverage=1, minextension=1, out=tadpole.fa, in=reads#.fastq, qin=33]	kmer size, minimum contig length	There are short trimmed reads in some samples, requiring the use of small kmers to include them in the analysis, which in turn reduces the length of produced contigs	Testing different kmers	Tested kmers based on read length		Dataset F
Closest genome sequence reference identification	Geneious	Geneious R10; Geneious mapper	Not applicable	Low sensitivity, fastest			All produced contigs were aligned to all 49 PepMV reference sequences. The resulting alignments were checked manually for accuracy and closest genome sequences selected based on that	Contigs with 100% sequence identity with multiple contigs were deemed to originate from the sequence variant represented with multiple other contigs
Reference assembly/mapping	Geneious	Geneious R10; Geneious for RNA-Seq mapper, Medium-low sensitivity (fast)	Not applicable	Medium-low sensitivity (fast): Allowed gaps 10% maximum per read, Maximum gap size:15, Word length:18, Maximum mismatches per read: 20%, Index word length:13, Maximum ambiguity:4 Beside that;s, Accuratelly map reads with errors to repeat regions	Mapping quality, gap size, overlap identity, ambiguity
Variant (SNP) calling	Geneious	Geneious R10; Find variations/SNPs	Not applicable	Minimum Coverage: 100 Only Find SNVs: false Maximum P-value: 10e-2 Minimum Variant Frequency: 0.01 Maximum P-value: 10e-2 Only Find SNVs: false Merge adjacent variations: false Ignore reference sequence (only find variations within the sample): false Exclude paired reads over: false excludeDistantPairedReadsPercent: 30 Use separate annotations for each variant at a position: true Record names of …	Coverage, variant frequency, P-value	Coverage: low minimum coverage leads to detection of false SNPs due to read misassembly to poly(A) tail and sequence start if trimming and/or assembly is not strict.	Checking the aligned reads visually to detect misassembled reads, checking several minimum coverages	Checking different minimun coverages (100, 500, 1000) to detect SNPs. The one with most identified SNPs (100) is reported for all contigs

## Sheet: G
	Software used	Version tool	Database name/version	Parameter(s) used	Known key parameter(s)	Key parameter(s) identified through PT	Manual analysis	Manual criteria	Comment
Pre-process/Quality control	Geneious Prime	Geneious Prime version 2020.1.2, Dedupe Duplicate Read Remover 38.37	n/a	Paired reads created from dataset_1A_R1 and dataset_1A_R2 Then removing duplicated reads Kmer seed length 31, Maximum Edits 0, Maximum Substitutions 0	no	no	no	no	procedure identical for all three datasets
Assembly without precise reference (de novo)	Geneious Prime	Geneious Prime version 2020.1.2	Viruses NCBI/ 14 April 2020	parameters de novo: dont allow gaps; minimum overlap 25; minimum overlap identity 95%; word length 24; index word length 14; maximum mismatches per read 2%		not tested	no	no
Closest genome sequence reference identification	Geneious Prime	Geneious Prime version 2020.1.2	Pepino mosaic virus full length sequences	blastn - default parameters in Geneious		not tested	no	no
Reference assembly/mapping	Geneious Prime	Geneious Prime version 2020.1.2	Pepino mosaic virus full length sequences	dataset 1 and 3 mapped into DQ000985 - parameters: allow gaps max 5% per read - maximum gap size 3; minimum overlap 35; minimum overlap identity 65%; word length 14; index word length 14; maximum mismatches per read 35%; dataset 2 mapped into AJ606359 - parameters: allow gaps max 5% per read - maximum gap size 3; minimum overlap 35; minimum overlap identity 65%; word length 14; index word length …		allow gaps; maximum gap size; minimum overlap identity; maximum mismatches per read	no	no	added extra ref for parameters used for mapping of dataset 2
Variant (SNP) calling	Geneious Prime	Geneious Prime version 2020.2.4	Pepino mosaic virus full length sequences	Find variations/SNPs - parameters: Minimum Coverage: no Minimum Variant Frequency: 0.05 Maximum Variant P-value: 10-6 Minimum Strand-Bias P-value 10-5 when exceeding 65% bias Find Variants: Inside and Outside CDS Analyze effect of variants on translations: no Calculate Variant P-values: yes Assumed quality of bases without quality: 20 P-value calculation method: Approximate Merge adjacent variati…	minimum variant frequency	no	no	no

## Sheet: H
	Software used	Version tool	Database name/version	Parameter(s) used	Known key parameter(s)	Key parameter(s) identified through PT	Manual analysis	Manual criteria	Comment
Pre-process/Quality control	FastQC - Cutadapt - Pear - Prinseq-lite - GNU awk	v0.11.5 - v2.8 - v.0.9.11 - v.0.20.4 - v. 4.1.4		Step 0: fastqc Dataset_1A_R1.fastq fastqc Dataset_1A_R2.fastq Step 1: cutadapt -a AGATCGGAAGAGCACACGTCTGAACTCCAGTCACTACGCT -A AGATCGGAAGAGCGTCGTGTAGGGAAAGAGTGTACTCTAG -e 0.10 -j 8 -o Dataset_1A_F_trimmed.fastq Dataset_1A_R_trimmed..fastq -p Dataset_1A_R1.fastq Dataset_1A_R2.fastq -m 30 Step 2: pear -f Dataset_1A_F_trimmed.fastq -r Dataset_1A_R_trimmed.fastq -o Dataset1 -p 1.0 -v 20 -y 100G -j 8 -…	Step 1(Cutadapt) :The program allows a maximum of 10% errors (-e 0.10) compared to the adapter sequence Trimmed fragments smaller than 30bp are removed (-m 30). Step 2 (Pear): The program merges the forward and reverse read with a minimum overlap size of 20bp (-v 20). If 2 consecutive bases are below 20 the read is trimmed (-q 20). If the resulting trimmed read is below 30bp, the read pair is rem…				Column E : the fastq files in italics need to be adjusted for each dataset, here: example given for the first dataset. Dataset_3Av2 had no adapters content, all reads were merged.	Dataset B
Assembly without precise reference (de novo)	SortMeRNA - virus_detect.pl	v4.2.0 - 1.7	vrl_Plants_232_U100	sortmerna --ref /usr/share/bioinf_databases/sortmerna/silva-bac-16s-id90.fasta --ref /usr/share/bioinf_databases/sortmerna/silva-bac-23s-id98.fasta --ref /usr/share/bioinf_databases/sortmerna/silva-arc-16s-id95.fasta --ref /usr/share/bioinf_databases/sortmerna/silva-arc-23s-id98.fasta --ref /usr/share/bioinf_databases/sortmerna/silva-euk-18s-id95.fasta --ref /usr/share/bioinf_databases/sortmerna/…	sortmerna tries to find matches to different rRNA databases of SILVA and removes rRNA sequences from fastq files. virus_detect.pl can efficiently and exhaustively analyze large-scale sRNA or RNA-seq datasets for virus identification. The program performs reference-guided assembly by aligning sRNA reads to the known virus reference database (GenBank gbvrl) as well as de novo assembly using Velvet …				No host-filtering was done. General : all italics needs to be adjusted to the correct fastq files depending on which dataset is analysed, also reference and output files are in italics
Closest genome sequence reference identification	BWA - SAMtools - PicardCommandLine MarkDuplicates - QUASR - mafft + neigbourg joining	v0.7.17-r1188 - v1.10 -2.18.25 -v6.08 - v7.453		bwa mem -t 8 -M reference.fasta dataset_1A_merged.fastq > dataset_1A_merged_mapped.sam (OR (in case of the unmerged files) --> bwa mem -t 8 - reference.fasta dataset_1A_R1.fastq dataset_1A_R2. fastq > dataset_1A_mapped.sam) samtools view -bS dataset_1A_merged_mapped.sam | samtools sort -o dataset_1A_merged_mapped.bam PicardCommandLine MarkDuplicates INPUT=dataset_1A_merged_mapped.bam OUTPUT=datas…					General : all italics needs to be adjusted to the correct fastq files depending on which dataset is analysed, also reference and output files are in italics
Reference assembly/mapping	BWA - SAMtools - PicardCommandLine MarkDuplicates	v0.7.17-r1188 - v1.10 - 2.18.25		familiar to previous steps
Variant (SNP) calling	SAMtools - pysamstats - bcftools	v1.10 - v1.1.2- v1.10.2		Step 1: make index file from bam : samtools index dataset.bam Step 2: create base quality file : pysamstats -t baseq_ext -f reference.fasta dataset.bam > baseqstats.txt Step 3: search for SNPs : pysamstats -t variation -f reference.fasta dataset.bam > variationstats.txt Step 4: search for INDELs : bcftools mpileup -d 10000 -L 10000 -f reference.fasta dataset.bam | grep 'INDEL' > mpileup_indels.txt	The variant frequency treshold is a key parameter: based on the results we selected a treshold rather arbitrarily

## Sheet: O
	Software used	Version tool	Database name/version	Parameter(s) used	Known key parameter(s)	Key parameter(s) identified through PT	Manual analysis	Manual criteria	Comment
Pre-process/Quality control	Trimmomatic	Version 0.36		ILLUMINACLIP:/apps/Trimmomatic/0.36/adapters/TruSeq3-PE.fa:2:30:10 SLIDINGWINDOW:3:20 MINLEN:20						Dataset C
Assembly without precise reference (de novo)	SPAdes	3.14.0		Default
Closest genome sequence reference identification	Blastn	2.6.0+	nt	-max_target_seqs 1 -outfmt "6 std stitle"			Identify all the PepMV contig hits (grep "virus") and extract only the complete genome sequence hits per sample.		If Blastn max_target_seqs is set to 1, the results will contain the hit that occurs first in the database that exceed the specified E-value, not necessarily the best hit.
Reference assembly/mapping	BWA/Samtools	0.7.13/1.10		BWA: Default, Samtools: samtools view -b -F 4, samtools sort			Count number of reads that mapped per accession, use samtools depth to count number of bases represented by reads to calculate genome coverage		BWA uses read names to identify pairs if paired end reads are in separate files. If paired end read names differ (eg. Sample 3C) create interleaved file.
Variant (SNP) calling	CLC genomics workbench	11.0.1		Ploidy level: 4; ignore positions with coverage above 100000; minimum coverage: 1000; minimum count: 10; minimum frequency: 1%				If the frequency was below 10% or the quality below 30, the variant was identified as suspect.

## Sheet: P
	Software used	Version tool	Database name/version	Parameter(s) used	Known key parameter(s)	Key parameter(s) identified through PT	Manual analysis	Manual criteria	Comment
Pre-process/Quality control	CLC Genomics Workbench	Version 11.0.1		Used parameters for trimming: "• Automatic removal of read-through adapter sequences. • Removal of low quality sequence. (limit = 0,05). • Removal of ambiguous nucleotides: maximal 2 nucleotides allowed. • Removal of adapter sequences, using the following adapters : ? 3' illumina REVERSE (AGATCGGAAGAGCACACGTCT), Reads: All, When an adapter is found: Trim 3' end, For reads without adapters: Keep t…	- Low quality sequences, ambigious nucleotidies, adapter sequences were removed. - Sequences below 50 nucleotidies were discarded.				For importing each dataset to CLC "paired reads" option was selected. After trimming, exporting dateset from CLC was performed as 2 files (R1 and R2)	Dataset D
Assembly without precise reference (de novo)	Except 3B, 3D and 3Av2own_P: Geneious Prime For 3B, 3D and 3A_v2own_P: CLC Genomic Workbench was used.	CLC: 11.0.1 Geneious Prime: 2019.1.3		For Geneious Prime: Tadpole assembler with default settings (just as a contig lenght: 300 was selected) were used. For CLC: word size:40, bubble size:300 and minimum contig length: 300 were used.	For Geneious Prime: Tadpole assembler with default settings (just as a contig lenght: 300 was selected) were used. For CLC: word size:40, bubble size:300 and minimum contig length: 300 were used.				All the read files regarding to the same dataset were used together for de novo assembly analyses. For 3B, 3D and 3Av2own_P dataset; Geneious Prime was given an error during the analyses so for those dateset CLC Genomic Workbech software was used.
Closest genome sequence reference identification	Blast module of Geneious Prime software was used.	2019.1.3	Custom blastn database was created with 71 Pepino mosaic virus complete genomes.	blastn program with hit table (matching region with annotations option) was used.	blastn program with hit table (matching region with annotations option) was used.			Through the retrieved hits which PepMV isolate has a max sequence length with 100% pairwise identity against blasted contigs was determined as reference.
Reference assembly/mapping	Geneious for RNA Seq mapper of Geneious Prime sotfware was used.	2019.1.3		For Geneious Prime: Geneious for RNA Seq mapper with custom sensivity options was used.	For custom sensivity: minimum mapping quality: 10, Allowed gaps 5% maximum per read, Maximum gap size:3, Minimum overlap:18, Word length:14, Maximum mismatches per read: 10%, Index word length:12, Maximum ambiguity:4 parameters were used. Beside that; Trim paired read overhangs, Accuratellymap reads with errors to repeat regions and Search more thoroughly for poor matching reads options selected.			At the end of the mapping, looked to the coverage status of RefSeq and positions of reads.
Variant (SNP) calling	Find Variation/SNP module of Geneious Prime software was used.	2019.1.3		Mimimum Variant Frequency: 0,15; Maximum Variant P-value:10-3 ; Minimum Strand-Bias P-value: 10-6 when exceeding 65% bias; Find Variants: Inside & Outside CDS; Merge adjacent variations; Use seperate annotations for each variant at a position			After analyses of all variations; positions and frequencies checked one by one.	Coverage value and positions of variations on reads were first criteria for decision.	All results were validated personally and giving comment for each variations.

## Sheet: Q
	Software used	Version tool	Database name/version	Parameter(s) used	Known key parameter(s)	Key parameter(s) identified through PT	Manual analysis	Manual criteria	Comment
Pre-process/Quality control	FastQC CLC Genomics WB FASTX Toolkit	0.11.5 6.5.1 0.0.14	fastx_formatter+fastx_clipper	transfer to CLC Genomics WB 6.5.1 1) import of paired reads -minimum distance, maximum distance -ticked paired reads and remove failed reads -ticked paired-end (forward-reverse) 2) export fasta FASTX: clipping of universal Illuimna adapter in case of 1A and 2A. In case of 3A was clipped just dummy adapter, default settings of fastx toolkit were used	CLC: the length of raw reads, for 1A and 2A, I used 50-250, for 3A 250-500 (max and min distance) FASTX: too-short reads (default is smaller than 5 nts)+adapter-only reads+N reads were discarded
Assembly without precise reference (de novo)	CLC Genomics WB	6.5.1
Closest genome sequence reference identification	BLASTN ,	2.6.0+							I used default parameters, as I sent you the command (blastn -query dataset.fa -db.fasta -out reslut.out) just to see what sequence I have to use for mapping. Then, I selected the sequences from the blast results based on the highest Score (Bits).
Reference assembly/mapping	CLC Genomics WB	12.0		Masking mode = No masking Match score = 2 Mismatch cost = 3 Cost of insertions and deletions = Linear gap cost Insertion cost = 3 Deletion cost = 3 Insertion open cost = 6 Insertion extend cost = 1 Deletion open cost = 6 Deletion extend cost = 1 Length fraction = 0.5 Similarity fraction = 0.8 Global alignment = No Non-specific match handling = Map randomly	global alignment (dont use it)
Variant (SNP) calling	CLC Genomics WB	12.0		Ploidy = 1 Ignore positions with coverage above = 100 000 Restrict calling to target regions = Not set Ignore broken pairs = Yes Ignore non-specific matches = Reads Minimum coverage = 10 Minimum count = 2 Minimum frequency (%) = 15 Base quality filter = No Read direction filter = No Relative read direction filter = No Read position filter = No Remove pyro-error variants = No	Minimum frequency is the key

[truncated: 5 more sheets: R, S, T, Y, Z]
