# Supplementary material for: Detection of single nucleotide polymorphisms in virus genomes assembled from high-throughput sequencing data: large-scale performance testing of sequence analysis strategies
Source: PeerJ. 2023 Aug 16;11:e15816. doi: 10.7717/peerj.15816 (PMC10439718; doi:10.7717/peerj.15816)
Supplement: Supplemental Information 3 [file peerj-11-15816-s003.xlsx]

## Sheet: all file
PT3_id	Sample	data_type	Read NB	reads length range	read length mean	read length stdDev	reads mean confidence	Q20	Q30	Q40	Nucleotide remaining NB	Merge (after, before, during, no) (merge before/after cleanning)	Paired (after, before, during, no)	Adapter trimming	quality trimming	Duplicate removing	%GC
A	1	merged	632884	38-241	144.5	32.9	38.4	0.977	0.956	0.625	91478318	after	before	YES	YES	NO	43
A	1	unmerged	450610	50-125	124.9	2.4	37.2	0.96	0.904	0.705	56285217	after	before	YES	YES	NO	40
A	2	merged	632342	35-241	144.6	32.8	38.4	0.977	0.956	0.624	91410185	after	before	YES	YES	NO	43
A	2	unmerged	850818	50-125	125	1.7	36.7	0.957	0.911	0.374	106311515	after	before	YES	YES	NO	31
A	3	merged	7904	246-491	400	2.8	29.6	0.938	0.665	0	3161868	after	before	YES	YES	NO	37
A	3	unmerged	2680228	250	250	0	27.5	0.876	0.596	0	670057000	after	before	YES	YES	NO	35
B	1	paired	1552896	1-125	113.9	30.8	35.9	0.961	0.904	0.236	176936647	no	before	YES	YES	NO	42
B	1	unpaired	22624	1-125	36.9	45.6	31.2	0.847	0.706	0	834395	no	before	YES	YES	NO	43
B	2	paired	1953564	1-125	116.1	27.9	35.9	0.959	0.907	0.184	226782756	no	before	YES	YES	NO	38
B	2	unpaired	22803	1-125	36.7	45.8	31.2	0.846	0.704	0	837387	no	before	YES	YES	NO	43
B	3	paired	2695464	3-250	185.7	55.6	29	0.929	0.666	0	500620603	no	before	YES	YES	NO	34
B	3	unpaired	276	54-250	197.1	48.9	29.3	0.931	0.699	0	54387	no	before	YES	YES	NO	35
C	1	R1	984245	20-125	112.7	22.3	36.2	0.978	0.932	0.19	110966047	no	no	YES	YES	NO	43
C	1	R2	958438	20-125	113.1	23.1	36.3	0.98	0.935	0.192	108424731	no	no	YES	YES	NO	43
C	2	R1	1184305	20-125	114.6	20.8	36.2	0.975	0.931	0.156	135734081	no	no	YES	YES	NO	39
C	2	R2	1158326	20-125	114.9	21.5	36.2	0.975	0.931	0.156	133128675	no	no	YES	YES	NO	39
C	3	R1	1348018	20-250	124.6	46.9	30.5	0.975	0.747	0	167906165	no	no	YES	YES	NO	34
C	3	R2	1330209	20-204	46.7	19.9	30	0.969	0.687	0	62151711	no	no	YES	YES	NO	34
D	1	R1	984503	50-125	115.9	14.3	35.7	0.962	0.907	0.185	114101960	no	before	YES	YES	NO	43
D	1	R2	984503	50-125	116	14.8	35.6	0.957	0.9	0.182	114223914	no	before	YES	YES	NO	43
D	2	R1	1184454	50-125	117.4	13.5	35.8	0.962	0.91	0.152	139092530	no	before	YES	YES	NO	39
D	2	R2	1184454	50-125	117.5	13.9	35.7	0.956	0.902	0.149	139201663	no	before	YES	YES	NO	39
D	3	R1	1214337	50-250	216.8	32.6	29.6	0.949	0.71	0	263243830	no	before	YES	YES	NO	34
D	3	R2	1214337	50-250	113.2	35.4	28.9	0.925	0.642	0	137432917	no	before	YES	YES	NO	35
G	1	paired	1672848	125	125	0	35.3	0.968	0.944	0	209106000	no	before	NO	NO	YES	43
G	2	paired	1848258	125	125	0	34.9	0.936	0.88	0.18	231032250	no	before	NO	NO	YES	41
G	3	paired	2696032	250	250	0	27.5	0.876	0.595	0	674008000	no	before	NO	NO	YES	35
H	1	merged	581448	50-230	136.3	38.3	38	0.977	0.952	0.674	79269433	during	before	YES	NO	YES	43
H	1	unmerged	397838	30-125	123.4	9.8	38.8	0.998	0.953	0.764	49107757	during	before	YES	NO	YES	41
H	2	merged	622557	50-230	139.5	41.8	37.9	0.977	0.951	0.627	86816448	during	before	YES	NO	YES	41
H	2	unmerged	409422	30-125	123.6	9.4	38.6	0.998	0.944	0.754	50582221	during	before	YES	NO	YES	41
H	3	merged	1348006	68-400	399.6	8.3	31.1	0.941	0.726	0.193	538687668	during	before	YES	NO	YES	34
O	1	R1	623418	20-125	117.3	20.3	36.9	0.988	0.95	0.289	73124452	no	before	YES	YES	NO	42
O	1	R2	623418	20-125	117.6	22.1	37	0.989	0.951	0.283	73328292	no	before	YES	YES	NO	42
O	2	R1	822405	20-125	118.9	18.3	36.7	0.981	0.944	0.216	97753291	no	before	YES	YES	NO	37
O	2	R2	822405	20-125	119	20.1	36.7	0.979	0.942	0.212	97836232	no	before	YES	YES	NO	37
O	3	R1	449330	20-250	154.8	52.3	30.2	0.964	0.735	0	69549102	no	before	YES	YES	NO	35
O	3	R2	449330	20-228	70.7	36.6	28.7	0.936	0.58	0	31776349	no	before	YES	YES	NO	35
P	1	R1	984885	50-125	115.9	14.3	35.7	0.962	0.907	0.185	114115247	no	before	YES	YES	NO	43
P	1	R2	984885	48-125	116.3	14.2	35.6	0.957	0.9	0.181	114523233	no	before	YES	YES	NO	43
P	2	R1	1184889	47-125	117.4	13.5	35.8	0.961	0.91	0.152	139105455	no	before	YES	YES	NO	39
P	2	R2	1184889	45-125	117.7	13.4	35.6	0.955	0.902	0.149	139507503	no	before	YES	YES	NO	39
P	3	R1	1330217	51-250	232.4	22.7	29.4	0.943	0.695	0	309102488	no	before	YES	YES	NO	34
P	3	R2	1330217	50-250	141.4	36.2	28.3	0.907	0.616	0	188079229	no	before	YES	YES	NO	35
Q	1	paired	1952730	5-125	99	39.3	-	-	-	-	193336238	no	before	YES	YES	NO	44
Q	2	paired	2334148	5-125	95.1	40.9	-	-	-	-	221874639	no	before	YES	YES	NO	41
Q	3	paired	2642768	5-250	169.4	88.8	-	-	-	-	447720540	no	before	YES	YES	NO	35
R	1	paired	1986328	3-125	88.8	42.7	37.2	1	0.974	0.237	176414856	no	before	NO	YES	NO	43
R	2	paired	2386304	3-125	82.8	42.2	37.2	1	0.974	0.212	197654972	no	before	NO	YES	NO	40
R	3	paired	2695912	3-181	32	22.2	32.2	1	0.918	0	86145495	no	before	NO	YES	NO	35
S	1	R1	972638	31-125	112	20.3	36.3	0.979	0.933	0.194	108906723	no	no	YES	YES	NO	43
S	1	R2	942560	31-125	113	20.4	36.3	0.98	0.936	0.195	106535906	no	no	YES	YES	NO	42
S	2	R1	1172789	31-125	114	19.1	36.2	0.976	0.932	0.158	133686023	no	no	YES	YES	NO	39
S	2	R2	1142448	31-125	114.9	19	19	0.975	0.932	0.158	131243266	no	no	YES	YES	NO	38
S	3	R1	1348018	20-250	124.6	46.9	30.5	0.975	0.747	0	167906165	no	no	NO	YES	NO	34
S	3	R2	1348018	10-204	46.3	20.1	30	0.969	0.688	0	62467789	no	no	NO	YES	NO	34
T	1	R1	980353	60-125	116.1	13.9	35.7	0.962	0.907	0.186	113783188	no	before	YES	YES	NO	43
T	1	R2	980353	60-125	116.5	13.8	35.6	0.957	0.9	0.182	114193690	no	before	YES	YES	NO	43
T	2	R1	1180237	59-125	117.6	13.1	35.8	0.961	0.91	0.152	138768721	no	before	YES	YES	NO	39
T	2	R2	1180237	59-125	117.9	13	35.6	0.956	0.902	0.149	139170613	no	before	YES	YES	NO	39
T	3	R1	1314098	65-250	232.4	22.6	29.4	0.943	0.696	0	305445366	no	before	YES	YES	NO	34
T	3	R2	1314098	60-250	142.4	35.1	28.3	0.907	0.617	0	187192852	no	before	YES	YES	NO	35
Z	1	merge/unmerged	745408	20-241	111.5	40.4	38.5	0.998	0.96	0.635	83139491	during	before	NO	YES	YES	41
Z	2	merge/unmerged	1153778	20-241	109.8	34.8	37.8	0.989	0.952	0.427	126677570	during	before	NO	YES	YES	34
Z	3	merge/unmerged	2424886	20-281	59.6	34.2	31.1	0.991	0.787	0	144554355	during	before	NO	YES	YES	34

## Sheet: main file
PT3_id	Sample num	Sample	data_type	Read NB	reads length range	read length mean	read length stdDev	reads mean confidence	Q20	Q30	Q40	Nucleotide remaining NB	Merge (after, before, during, no) (merge before/after cleanning)	Paired (after, before, during, no)	Adapter trimming	quality trimming	Duplicate removing	%GC		no	0												Choisir un represnetant par combinaison		reads lenght vs quality => merge
A	1	1	merged	632884	38-241	144.5	32.9	38.4	0.977	0.956	0.625	91478318	4	2	1	1	0	43		yes	1
B	1	1	paired	1552896	1-125	113.9	30.8	35.9	0.961	0.904	0.236	176936647	0	2	1	1	0	42		before	2
C	1	1	R1	984245	20-125	112.7	22.3	36.2	0.978	0.932	0.19	110966047	0	0	1	1	0	43		during	3
D	1	1	R1	984503	50-125	115.9	14.3	35.7	0.962	0.907	0.185	114101960	0	2	1	1	0	43		after	4
G	1	1	paired	1672848	125	125	0	35.3	0.968	0.944	0	209106000	0	2	0	0	1	43
H	1	1	merged	581448	50-230	136.3	38.3	38	0.977	0.952	0.674	79269433	3	2	1	0	1	43
O	1	1	R1	623418	20-125	117.3	20.3	36.9	0.988	0.95	0.289	73124452	0	2	1	1	0	42
P	1	1	R1	984885	50-125	115.9	14.3	35.7	0.962	0.907	0.185	114115247	0	2	1	1	0	43
Q	1	1	paired	1952730	5-125	99	39.3	-	-	-	-	193336238	0	2	1	1	0	44
R	1	1	paired	1986328	3-125	88.8	42.7	37.2	1	0.974	0.237	176414856	0	2	0	1	0	43
S	1	1	R1	972638	31-125	112	20.3	36.3	0.979	0.933	0.194	108906723	0	0	1	1	0	43
T	1	1	R1	980353	60-125	116.1	13.9	35.7	0.962	0.907	0.186	113783188	0	2	1	1	0	43
Z	1	1	merge/unmerged	745408	20-241	111.5	40.4	38.5	0.998	0.96	0.635	83139491	3	2	0	1	1	41
A	2	2	merged	632342	35-241	144.6	32.8	38.4	0.977	0.956	0.624	91410185	4	2	1	1	0	43
B	2	2	paired	1953564	1-125	116.1	27.9	35.9	0.959	0.907	0.184	226782756	0	2	1	1	0	38
C	2	2	R1	1184305	20-125	114.6	20.8	36.2	0.975	0.931	0.156	135734081	0	0	1	1	0	39
D	2	2	R1	1184454	50-125	117.4	13.5	35.8	0.962	0.91	0.152	139092530	0	2	1	1	0	39
G	2	2	paired	1848258	125	125	0	34.9	0.936	0.88	0.18	231032250	0	2	0	0	1	41
H	2	2	merged	622557	50-230	139.5	41.8	37.9	0.977	0.951	0.627	86816448	3	2	1	0	1	41
O	2	2	R1	822405	20-125	118.9	18.3	36.7	0.981	0.944	0.216	97753291	0	2	1	1	0	37
P	2	2	R1	1184889	47-125	117.4	13.5	35.8	0.961	0.91	0.152	139105455	0	2	1	1	0	39
Q	2	2	paired	2334148	5-125	95.1	40.9	-	-	-	-	221874639	0	2	1	1	0	41
R	2	2	paired	2386304	3-125	82.8	42.2	37.2	1	0.974	0.212	197654972	0	2	0	1	0	40
S	2	2	R1	1172789	31-125	114	19.1	36.2	0.976	0.932	0.158	133686023	0	0	1	1	0	39
T	2	2	R1	1180237	59-125	117.6	13.1	35.8	0.961	0.91	0.152	138768721	0	2	1	1	0	39
Z	2	2	merge/unmerged	1153778	20-241	109.8	34.8	37.8	0.989	0.952	0.427	126677570	3	2	0	1	1	34
A	3	3	merged	7904	246-491	400	2.8	29.6	0.938	0.665	0	3161868	4	2	1	1	0	37
B	3	3	paired	2695464	3-250	185.7	55.6	29	0.929	0.666	0	500620603	0	2	1	1	0	34
C	3	3	R1	1348018	20-250	124.6	46.9	30.5	0.975	0.747	0	167906165	0	0	1	1	0	34
D	3	3	R1	1214337	50-250	216.8	32.6	29.6	0.949	0.71	0	263243830	0	2	1	1	0	34
G	3	3	paired	2696032	250	250	0	27.5	0.876	0.595	0	674008000	0	2	0	0	1	35
H	3	3	merged	1348006	68-400	399.6	8.3	31.1	0.941	0.726	0.193	538687668	3	2	1	0	1	34
O	3	3	R1	449330	20-250	154.8	52.3	30.2	0.964	0.735	0	69549102	0	2	1	1	0	35
P	3	3	R1	1330217	51-250	232.4	22.7	29.4	0.943	0.695	0	309102488	0	2	1	1	0	34
Q	3	3	paired	2642768	5-250	169.4	88.8	-	-	-	-	447720540	0	2	1	1	0	35
R	3	3	paired	2695912	3-181	32	22.2	32.2	1	0.918	0	86145495	0	2	0	1	0	35
S	3	3	R1	1348018	20-250	124.6	46.9	30.5	0.975	0.747	0	167906165	0	0	0	1	0	34
T	3	3	R1	1314098	65-250	232.4	22.6	29.4	0.943	0.696	0	305445366	0	2	1	1	0	34
Z	3	3	merge/unmerged	2424886	20-281	59.6	34.2	31.1	0.991	0.787	0	144554355	3	2	0	1	1	34
PT3_id	Sample num	Sample	data_type	Read NB	reads length range	read length mean	read length stdDev	reads mean confidence	Q20	Q30	Q40	Nucleotide remaining NB	Merge (after, before, during, no) (merge before/after cleanning)	Paired (after, before, during, no)	Adapter trimming	quality trimming	Duplicate removing	%GC
A	1	1	merged	632884	38-241	144.5	32.9	38.4	0.977	0.956	0.625	91478318	4	2	1	1	0	43
B	1	1	paired	1552896	1-125	113.9	30.8	35.9	0.961	0.904	0.236	176936647	0	2	1	1	0	42
C	1	1	R1	984245	20-125	112.7	22.3	36.2	0.978	0.932	0.19	110966047	0	0	1	1	0	43
D	1	1	R1	984503	50-125	115.9	14.3	35.7	0.962	0.907	0.185	114101960	0	2	1	1	0	43
G	1	1	paired	1672848	125	125	0	35.3	0.968	0.944	0	209106000	0	2	0	0	1	43
H	1	1	merged	581448	50-230	136.3	38.3	38	0.977	0.952	0.674	79269433	3	2	1	0	1	43
O	1	1	R1	623418	20-125	117.3	20.3	36.9	0.988	0.95	0.289	73124452	0	2	1	1	0	42
P	1	1	R1	984885	50-125	115.9	14.3	35.7	0.962	0.907	0.185	114115247	0	2	1	1	0	43
Q	1	1	paired	1952730	5-125	99	39.3	-	-	-	-	193336238	0	2	1	1	0	44
R	1	1	paired	1986328	3-125	88.8	42.7	37.2	1	0.974	0.237	176414856	0	2	0	1	0	43
S	1	1	R1	972638	31-125	112	20.3	36.3	0.979	0.933	0.194	108906723	0	0	1	1	0	43
T	1	1	R1	980353	60-125	116.1	13.9	35.7	0.962	0.907	0.186	113783188	0	2	1	1	0	43
Z	1	1	merge/unmerged	745408	20-241	111.5	40.4	38.5	0.998	0.96	0.635	83139491	3	2	0	1	1	41
A	2	2	merged	632342	35-241	144.6	32.8	38.4	0.977	0.956	0.624	91410185	4	2	1	1	0	43
B	2	2	paired	1953564	1-125	116.1	27.9	35.9	0.959	0.907	0.184	226782756	0	2	1	1	0	38
C	2	2	R1	1184305	20-125	114.6	20.8	36.2	0.975	0.931	0.156	135734081	0	0	1	1	0	39
D	2	2	R1	1184454	50-125	117.4	13.5	35.8	0.962	0.91	0.152	139092530	0	2	1	1	0	39
G	2	2	paired	1848258	125	125	0	34.9	0.936	0.88	0.18	231032250	0	2	0	0	1	41
H	2	2	merged	622557	50-230	139.5	41.8	37.9	0.977	0.951	0.627	86816448	3	2	1	0	1	41
O	2	2	R1	822405	20-125	118.9	18.3	36.7	0.981	0.944	0.216	97753291	0	2	1	1	0	37
P	2	2	R1	1184889	47-125	117.4	13.5	35.8	0.961	0.91	0.152	139105455	0	2	1	1	0	39
Q	2	2	paired	2334148	5-125	95.1	40.9	-	-	-	-	221874639	0	2	1	1	0	41
R	2	2	paired	2386304	3-125	82.8	42.2	37.2	1	0.974	0.212	197654972	0	2	0	1	0	40
S	2	2	R1	1172789	31-125	114	19.1	36.2	0.976	0.932	0.158	133686023	0	0	1	1	0	39
T	2	2	R1	1180237	59-125	117.6	13.1	35.8	0.961	0.91	0.152	138768721	0	2	1	1	0	39
Z	2	2	merge/unmerged	1153778	20-241	109.8	34.8	37.8	0.989	0.952	0.427	126677570	3	2	0	1	1	34
A	3	3	merged	7904	246-491	400	2.8	29.6	0.938	0.665	0	3161868	4	2	1	1	0	37
B	3	3	paired	2695464	3-250	185.7	55.6	29	0.929	0.666	0	500620603	0	2	1	1	0	34
C	3	3	R1	1348018	20-250	124.6	46.9	30.5	0.975	0.747	0	167906165	0	0	1	1	0	34
D	3	3	R1	1214337	50-250	216.8	32.6	29.6	0.949	0.71	0	263243830	0	2	1	1	0	34
G	3	3	paired	2696032	250	250	0	27.5	0.876	0.595	0	674008000	0	2	0	0	1	35
H	3	3	merged	1348006	68-400	399.6	8.3	31.1	0.941	0.726	0.193	538687668	3	2	1	0	1	34
O	3	3	R1	449330	20-250	154.8	52.3	30.2	0.964	0.735	0	69549102	0	2	1	1	0	35
P	3	3	R1	1330217	51-250	232.4	22.7	29.4	0.943	0.695	0	309102488	0	2	1	1	0	34
Q	3	3	paired	2642768	5-250	169.4	88.8	-	-	-	-	447720540	0	2	1	1	0	35
R	3	3	paired	2695912	3-181	32	22.2	32.2	1	0.918	0	86145495	0	2	0	1	0	35
S	3	3	R1	1348018	20-250	124.6	46.9	30.5	0.975	0.747	0	167906165	0	0	0	1	0	34
T	3	3	R1	1314098	65-250	232.4	22.6	29.4	0.943	0.696	0	305445366	0	2	1	1	0	34
Z	3	3	merge/unmerged	2424886	20-28134	59.6	34.2	31.1	0.991	0.787	0	144554355	3	2	0	1	1	34

## Sheet: secondary file
PT3_id	Sample	data_type	Read NB	reads length range	read length mean	read length stdDev	reads mean confidence	Q20	Q30	Q40	Nucleotide remaining NB	Merge (after, before, during, no) (merge before/after cleanning)	Paired (after, before, during, no)	Adapter trimming	quality trimming	Duplicate removing	%GC
A	1	unmerged	450610	50-125	124.9	2.4	37.2	0.96	0.904	0.705	56285217	after	before	YES	YES	NO	40
A	2	unmerged	850818	50-125	125	1.7	36.7	0.957	0.911	0.374	106311515	after	before	YES	YES	NO	31
A	3v1	unmerged	2680228	250	250	0	27.5	0.876	0.596	0	670057000	after	before	YES	YES	NO	35
B	1	unpaired	22624	1-125	36.9	45.6	31.2	0.847	0.706	0	834395	no	before	YES	YES	NO	43
B	2	unpaired	22803	1-125	36.7	45.8	31.2	0.846	0.704	0	837387	no	before	YES	YES	NO	43
B	3v2	unpaired	276	54-250	197.1	48.9	29.3	0.931	0.699	0	54387	no	before	YES	YES	NO	35
C	1	R2	958438	20-125	113.1	23.1	36.3	0.98	0.935	0.192	108424731	no	no	YES	YES	NO	43
C	2	R2	1158326	20-125	114.9	21.5	36.2	0.975	0.931	0.156	133128675	no	no	YES	YES	NO	39
C	3v1	R2	1330209	20-204	46.7	19.9	30	0.969	0.687	0	62151711	no	no	YES	YES	NO	34
D	1	R2	984503	50-125	116	14.8	35.6	0.957	0.9	0.182	114223914	no	before	YES	YES	NO	43
D	2	R2	1184454	50-125	117.5	13.9	35.7	0.956	0.902	0.149	139201663	no	before	YES	YES	NO	39
D	3v2	R2	1214337	50-250	113.2	35.4	28.9	0.925	0.642	0	137432917	no	before	YES	YES	NO	35
H	1	unmerged	397838	30-125	123.4	9.8	38.8	0.998	0.953	0.764	49107757	during	before	YES	NO	YES	41
H	2	unmerged	409422	30-125	123.6	9.4	38.6	0.998	0.944	0.754	50582221	during	before	YES	NO	YES	41
O	1	R2	623418	20-125	117.6	22.1	37	0.989	0.951	0.283	73328292	no	before	YES	YES	NO	42
O	2	R2	822405	20-125	119	20.1	36.7	0.979	0.942	0.212	97836232	no	before	YES	YES	NO	37
O	3v1	R2	449330	20-228	70.7	36.6	28.7	0.936	0.58	0	31776349	no	before	YES	YES	NO	35
P	1	R2	984885	48-125	116.3	14.2	35.6	0.957	0.9	0.181	114523233	no	before	YES	YES	NO	43
P	2	R2	1184889	45-125	117.7	13.4	35.6	0.955	0.902	0.149	139507503	no	before	YES	YES	NO	39
P	3v2	R2	1330217	50-250	141.4	36.2	28.3	0.907	0.616	0	188079229	no	before	YES	YES	NO	35
S	1	R2	942560	31-125	113	20.4	36.3	0.98	0.936	0.195	106535906	no	no	YES	YES	NO	42
S	2	R2	1142448	31-125	114.9	19	19	0.975	0.932	0.158	131243266	no	no	YES	YES	NO	38
S	3v2	R2	1348018	10-204	46.3	20.1	30	0.969	0.688	0	62467789	no	no	NO	YES	NO	34
T	1	R2	980353	60-125	116.5	13.8	35.6	0.957	0.9	0.182	114193690	no	before	YES	YES	NO	43
T	2	R2	1180237	59-125	117.9	13	35.6	0.956	0.902	0.149	139170613	no	before	YES	YES	NO	39
T	3v2	R2	1314098	60-250	142.4	35.1	28.3	0.907	0.617	0	187192852	no	before	YES	YES	NO	35

## Sheet: mix_overall
ID	PT3_id	Sample	data_type	Read NB	reads length range	read length mean	read length stdDev	reads mean confidence	Q20	Q30	Q40	Nucleotide remaining NB	Merge (after before during no) (merge before/after cleanning)	Paired (after before during no)	Adapter trimming	quality trimming	Duplicate removing		no	0
A1	A	1	merge/unmerged	1083494	38-241	136.4	27	38	0.97	0.937	0.655	147763535	4	2	1	1	0		yes	1
H1	H	1	merge/unmerged	979286	30-230	131.1	30.8	38.3	0.985	0.951	0.706	128377190	3	2	1	0	1		before	2
Z1	Z	1	merge/unmerged	745408	20-241	111.5	40.4	38.5	0.998	0.96	0.635	83139491	3	2	0	1	1		during	3
A2	A	2	merge/unmerged	1483160	35-241	133.3	23.6	37.5	0.966	0.932	0.49	197721700	4	2	1	1	0		after	4
H2	H	2	merge/unmerged	1031979	30-230	133.1	33.9	38.2	0.985	0.95	0.676	137398669	3	2	1	0	1
Z2	Z	2	merge/unmerged	1153778	20-241	109.8	34.8	37.8	0.989	0.952	0.427	126677570	3	2	0	1	1
A3	A	3	merge/unmerged	2688132	246-491	250.4	8.1	27.5	0.877	0.596	0	673218868	4	2	1	1	0
H3	H	3	merge/unmerged	1348006	68-400	399.6	8.3	31.1	0.941	0.726	0.193	538687668	3	2	1	0	1
Z3	Z	3	merge/unmerged	2424886	20-281	59.6	34.2	31.1	0.991	0.787	0	144554355	3	2	0	1	1
																		correlation quality nb read/nucleotide
ID	PT3_id	Sample	data_type	Read NB	reads length range	read length mean	read length stdDev	reads mean confidence	Q20	Q30	Q40	Nucleotide remaining NB	Merge (after before during no) (merge before/after cleanning)	Paired (after before during no)	Adapter trimming	quality trimming	Duplicate removing
B1	B	1	paired/unpaired	1575520	1-125	112.8	32.4	35.8	0.96	0.903	0.234	177771042	0	2	1	1	0
C1	C	1	R1/R2	1942683	20-125	112.9	22.7	36.3	0.979	0.933	0.191	219390778	0	0	1	1	0
D1	D	1	R1/R2	1969006	50-125	116	14.6	35.7	0.96	0.904	0.183	228325874	0	2	1	1	0
G1	G	1	paired/unpaired	1672848	125	125	0	34.8	0.934	0.875	0.193	209106000	0	2	0	0	1
O1	O	1	R1/R2	1246836	20-125	117.5	21.2	36.9	0.988	0.951	0.286	146452744	0	2	1	1	0
P1	P	1	R1/R2	1969770	48-125	116.1	14.3	35.6	0.959	0.903	0.183	228638480	0	2	1	1	0
Q1	Q	1	paired/unpaired	1952730	5-125	99	39.3	-	-	-	-	193336238	0	2	1	1	0
R1	R	1	paired/unpaired	1986328	3-125	88.8	42.7	37.2	1	0.974	0.237	176414856	0	2	0	1	0
S1	S	1	R1/R2	1915198	31-125	112.5	20.4	36.3	0.98	0.934	0.194	215442629	0	0	1	1	0
T1	T	1	R1/R2	1960706	60-125	116.3	13.8	35.7	0.959	0.904	0.184	227976878	0	2	1	1	0
Y1	Y	1	R1/R2	1990272	1-125	115.6	15.8	35.6	0.958	0.902	0.182	229982148	0	2	1	1	0
B2	B	2	paired/unpaired	1976367	1-125	115.2	29.4	35.9	0.959	0.906	0.183	227620143	0	2	1	1	0
C2	C	2	R1/R2	2342631	20-125	114.8	21.1	36.2	0.975	0.931	0.156	268862756	0	0	1	1	0
D2	D	2	R1/R2	2368908	50-125	117.5	13.7	35.7	0.959	0.906	0.151	278294193	0	2	1	1	0
G2	G	2	paired/unpaired	1848258	125	125	0	34.9	0.936	0.88	0.18	231032250	0	2	0	0	1
O2	O	2	R1/R2	1644810	20-125	118.9	19.2	36.7	0.98	0.943	0.214	195589523	0	2	1	1	0
P2	P	2	R1/R2	2369778	45-125	117.6	13.4	35.7	0.958	0.906	0.15	278612958	0	2	1	1	0
Q2	Q	2	paired/unpaired	2334148	5-125	95.1	40.9	-	-	-	-	221874639	0	2	1	1	0
R2	R	2	paired/unpaired	2386304	3-125	82.8	42.2	37.2	1	0.974	0.212	197654972	0	2	0	1	0
S2	S	2	R1/R2	2315237	31-125	114.4	19.1	36.3	0.975	0.932	0.158	264929289	0	0	1	1	0
T2	T	2	R1/R2	2360474	59-125	117.7	13	35.7	0.959	0.906	0.151	277939334	0	2	1	1	0
Y2	Y	2	R1/R2	2390208	1-125	117.1	14.8	35.7	0.958	0.905	0.15	279973829	0	2	1	1	0
B3	B	3	paired/unpaired	2695740	3-250	185.7	55.6	29	0.929	0.666	0	500674990	0	2	1	1	0
C3	C	3	R1/R2	2660416	20-250	85.7	53	30.4	0.974	0.731	0	227897534	0	0	1	1	0
D3	D	3	R1/R2	2428674	50-250	165	62	29.4	0.941	0.686	0	400681355	0	2	1	1	0
G3	G	3	paired/unpaired	2696032	250	250	0	27.5	0.876	0.595	0	674008000	0	2	0	0	1
O3	O	3	R1/R2	898660	20-250	112.8	61.7	29.7	0.955	0.686	0	101325451	0	2	1	1	0
P3	P	3	R1/R2	2660434	50-250	186.9	54.6	29	0.929	0.665	0	497181717	0	2	1	1	0
Q3	Q	3	paired/unpaired	2642768	5-250	169.4	88.8	-	-	-	-	447720540	0	2	1	1	0
R3	R	3	paired/unpaired	2695912	3-181	32	22.2	32.2	1	0.918	0	86145495	0	2	0	1	0
S3	S	3	R1/R2	2696036	10-250	85.4	53.2	30.4	0.974	0.731	0	230373954	0	0	1	1	0
T3	T	3	R1/R2	2628196	60-250	187.4	53.8	29	0.929	0.666	0	492638218	0	2	1	1	0
Y3	Y	3	R1/R2	2696036	15-250	186.2	55.7	29	0.929	0.664	0	501919726	0	2	1	1	0

## Sheet: mix_merged
		1				3		2											no	0
ID	PT3_id	Sample	data_type	Read NB	reads length range	read length mean	read length stdDev	reads mean confidence	Q20	Q30	Q40	Nucleotide remaining NB	Merge (after before during no) (merge before/after cleanning)	Paired (after before during no)	Adapter trimming	quality trimming	Duplicate removing		yes	1
A1	A	1	merge/unmerged	1083494	38-241	136.4	27	38	0.97	0.937	0.655	147763535	4	2	1	1	0		before	2
H1	H	1	merge/unmerged	979286	30-230	131.1	30.8	38.3	0.985	0.951	0.706	128377190	3	2	1	0	1		during	3
Z1	Z	1	merge/unmerged	745408	20-241	111.5	40.4	38.5	0.998	0.96	0.635	83139491	3	2	0	1	1		after	4
A2	A	2	merge/unmerged	1483160	35-241	133.3	23.6	37.5	0.966	0.932	0.49	197721700	4	2	1	1	0
Z2	Z	2	merge/unmerged	1153778	20-241	109.8	34.8	37.8	0.989	0.952	0.427	126677570	3	2	0	1	1
H2	H	2	merge/unmerged	1031979	30-230	133.1	33.9	38.2	0.985	0.95	0.676	137398669	3	2	1	0	1
A3	A	3	merge/unmerged	2688132	246-491	250.4	8.1	27.5	0.877	0.596	0	673218868	4	2	1	1	0
Z3	Z	3	merge/unmerged	2424886	20-281	59.6	34.2	31.1	0.991	0.787	0	144554355	3	2	0	1	1
H3	H	3	merge/unmerged	1348006	68-400	399.6	8.3	31.1	0.941	0.726	0.193	538687668	3	2	1	0	1
1
2

## Sheet: mix_non_merged
ID	PT3_id	Sample	data_type	Read NB	reads length range	read length mean	read length stdDev	reads mean confidence	Q20	Q30	Q40	Nucleotide remaining NB	Merge (after before during no) (merge before/after cleanning)	Paired (after before during no)	Adapter trimming	quality trimming	Duplicate removing
G1	G	1	paired/unpaired	1672848	125	125	0	34.8	0.934	0.875	0.193	209106000	0	2	0	0	1
Y1	Y	1	R1/R2	1990272	1-125	115.6	15.8	35.6	0.958	0.902	0.182	229982148	0	2	1	1	0
P1	P	1	R1/R2	1969770	48-125	116.1	14.3	35.6	0.959	0.903	0.183	228638480	0	2	1	1	0
D1	D	1	R1/R2	1969006	50-125	116	14.6	35.7	0.96	0.904	0.183	228325874	0	2	1	1	0
T1	T	1	R1/R2	1960706	60-125	116.3	13.8	35.7	0.959	0.904	0.184	227976878	0	2	1	1	0
B1	B	1	paired/unpaired	1575520	1-125	112.8	32.4	35.8	0.96	0.903	0.234	177771042	0	2	1	1	0
S1	S	1	R1/R2	1915198	31-125	112.5	20.4	36.3	0.98	0.934	0.194	215442629	0	0	1	1	0
C1	C	1	R1/R2	1942683	20-125	112.9	22.7	36.3	0.979	0.933	0.191	219390778	0	0	1	1	0
O1	O	1	R1/R2	1246836	20-125	117.5	21.2	36.9	0.988	0.951	0.286	146452744	0	2	1	1	0
R1	R	1	paired/unpaired	1986328	3-125	88.8	42.7	37.2	1	0.974	0.237	176414856	0	2	0	1	0
Q1	Q	1	paired/unpaired	1952730	5-125	99	39.3	-	-	-	-	193336238	0	2	1	1	0
G2	G	2	paired/unpaired	1848258	125	125	0	34.9	0.936	0.88	0.18	231032250	0	2	0	0	1
Y2	Y	2	R1/R2	2390208	1-125	117.1	14.8	35.7	0.958	0.905	0.15	279973829	0	2	1	1	0
D2	D	2	R1/R2	2368908	50-125	117.5	13.7	35.7	0.959	0.906	0.151	278294193	0	2	1	1	0
P2	P	2	R1/R2	2369778	45-125	117.6	13.4	35.7	0.958	0.906	0.15	278612958	0	2	1	1	0
T2	T	2	R1/R2	2360474	59-125	117.7	13	35.7	0.959	0.906	0.151	277939334	0	2	1	1	0
B2	B	2	paired/unpaired	1976367	1-125	115.2	29.4	35.9	0.959	0.906	0.183	227620143	0	2	1	1	0
C2	C	2	R1/R2	2342631	20-125	114.8	21.1	36.2	0.975	0.931	0.156	268862756	0	0	1	1	0
S2	S	2	R1/R2	2315237	31-125	114.4	19.1	36.3	0.975	0.932	0.158	264929289	0	0	1	1	0
O2	O	2	R1/R2	1644810	20-125	118.9	19.2	36.7	0.98	0.943	0.214	195589523	0	2	1	1	0
R2	R	2	paired/unpaired	2386304	3-125	82.8	42.2	37.2	1	0.974	0.212	197654972	0	2	0	1	0
Q2	Q	2	paired/unpaired	2334148	5-125	95.1	40.9	-	-	-	-	221874639	0	2	1	1	0
G3	G	3	paired/unpaired	2696032	250	250	0	27.5	0.876	0.595	0	674008000	0	2	0	0	1
B3	B	3	paired/unpaired	2695740	3-250	185.7	55.6	29	0.929	0.666	0	500674990	0	2	1	1	0
Y3	Y	3	R1/R2	2696036	15-250	186.2	55.7	29	0.929	0.664	0	501919726	0	2	1	1	0
P3	P	3	R1/R2	2660434	50-250	186.9	54.6	29	0.929	0.665	0	497181717	0	2	1	1	0
T3	T	3	R1/R2	2628196	60-250	187.4	53.8	29	0.929	0.666	0	492638218	0	2	1	1	0
D3	D	3	R1/R2	2428674	50-250	165	62	29.4	0.941	0.686	0	400681355	0	2	1	1	0
O3	O	3	R1/R2	898660	20-250	112.8	61.7	29.7	0.955	0.686	0	101325451	0	2	1	1	0
S3	S	3	R1/R2	2696036	10-250	85.4	53.2	30.4	0.974	0.731	0	230373954	0	0	1	1	0
C3	C	3	R1/R2	2660416	20-250	85.7	53	30.4	0.974	0.731	0	227897534	0	0	1	1	0
R3	R	3	paired/unpaired	2695912	3-181	32	22.2	32.2	1	0.918	0	86145495	0	2	0	1	0
Q3	Q	3	paired/unpaired	2642768	5-250	169.4	88.8	-	-	-	-	447720540	0	2	1	1	0
		1
