# Supplementary material for: Detection of single nucleotide polymorphisms in virus genomes assembled from high-throughput sequencing data: large-scale performance testing of sequence analysis strategies
Source: PeerJ. 2023 Aug 16;11:e15816. doi: 10.7717/peerj.15816 (PMC10439718; doi:10.7717/peerj.15816)
Supplement: Supplemental Information 4 [file peerj-11-15816-s004.xlsx]

## Sheet: sample_1
ID	PT1_id	Sample	reference found	Nb reads	identical site	Mean coverage	cov std dev	coverage range	comment	Mapping parameters		ID	PT1_id	Nb reads	Difference (nb read) with expectation	% difference (nb read) with expectation
A1	A	1	DQ000985	389322	1527 (23.6%)	7719.7	1450.3	15-8531		Comment: Mapper=Geneious Sensitivity=Medium-Low Sensitivity/Fast Trim Before Mapping=Do not Trim Minimum mapping quality=30 Map multiple best matches=To none Trim paired read overhangs=yes Allow Gaps;maximum per read =10%; maximum Gap Size = 15 Ignore words repeated more than=12 times Maximum Mismatches Per Read=20% Maximum Ambiguity=4 Accurately map reads with errors to repeat regions=yes		A1	A	389322	-10678	2.6695
B1	A	1	DQ000985	366495	162 (2.1%)	7196.5	1552.5	1-8058		Comment: Mapper=Geneious Sensitivity=Medium Sensitivity/Fast Trim Before Mapping=Do not Trim Minimum mapping quality=30 Map multiple best matches=To none Trim paired read overhangs=yes Allow Gaps;maximum per read =15%; maximum Gap Size = 50 Ignore words repeated more than=12 times Maximum Mismatches Per Read=30% Maximum Ambiguity=4 Accurately map reads with errors to repeat regions=yes		B1	A	366495	-33505	8.37625
C1	A	1	DQ000985	400001	1485 (22.9%)	7797.6	1460.6	15-8611		Comment: Mapper=Geneious Sensitivity=Medium-Low Sensitivity/Fast Trim Before Mapping=Do not Trim Minimum mapping quality=30 Map multiple best matches=To none Trim paired read overhangs=yes Allow Gaps;maximum per read =10%; maximum Gap Size = 15 Ignore words repeated more than=12 times Maximum Mismatches Per Read=20% Maximum Ambiguity=4 Accurately map reads with errors to repeat regions=yes		C1	A	400001	1	0.00025
D1	A	1	DQ000985	400007	1484 (22.9%)	7795.1	1459.9	15-8611		Comment: Mapper=Geneious Sensitivity=Medium-Low Sensitivity/Fast Trim Before Mapping=Do not Trim Minimum mapping quality=30 Map multiple best matches=To none Trim paired read overhangs=yes Allow Gaps;maximum per read =10%; maximum Gap Size = 15 Ignore words repeated more than=12 times Maximum Mismatches Per Read=20% Maximum Ambiguity=4 Accurately map reads with errors to repeat regions=yes		D1	A	400007	7	0.00175
A1	B	1	DQ000985	400001	1592 (24.6%)	7737.1	1457.1	15-8611		Comment: "Masking mode = No masking Mismatch cost = 2 Cost of insertions and deletions = Linear gap cost Insertion cost = 3 Deletion cost = 3 Insertion open cost = 6 Insertion extend cost = 1 Deletion open cost = 6 Deletion extend cost = 1 Length fraction = 0.9 Similarity fraction = 0.95 Global alignment = No Non-specific match handling = Map randomly Output mode = Create stand-alone read mapping…		A1	B	400001	1	0.00025
B1	B	1	DQ000985	364068	1660 (25.6%)	7182.4	1342.5	15-7966				B1	B	364068	-35932	8.983
C1	B	1	DQ000985	400001	1569 (24.2%)	7796.6	1462	15-8611				C1	B	400001	1	0.00025
D1	B	1	DQ000985	400003	1571 (24.3%)	7794	1461.3	15-8611				D1	B	400003	3	0.00075
A1	C	1	DQ000985	-	6410 (99.95%)	-	-	-	mapped contig instead of reads	Comment: Costum Sensitivity, extremly slow, min overlap=25, min overlap identity=80, word length=14, Index word length=12, Max mis per read=20, Max ambiguity=4		A1	D	400005	5	0.00125
B1	C	1	DQ000985	-	4330 (99.95%)	-	-	-	mapped contig instead of reads			B1	D	364145	-35855	8.96375
C1	C	1	DQ000985	-	5714 (89.1%)	-	-	-	mapped contig instead of reads			C1	D	400001	1	0.00025
D1	C	1	DQ000985	-	5714 (89.1%)	-	-	-	mapped contig instead of reads			D1	D	400007	7	0.00175
A1	D	1	DQ000985	400005	1482 (22.9%)	7797.7	1460.6	15-8611		Comment: Mapper=Geneious Sensitivity=Low Sensitivity/Fastest Trim Before Mapping=Do not Trim Map multiple best matches=Randomly Allow Gaps;maximum per read =10%; maximum Gap Size = 3 Ignore words repeated more than=8 times Maximum Mismatches Per Read=10% Maximum Ambiguity=4		A1	G	383453	-16547	4.13675
B1	D	1	DQ000985	364145	1467 (22.6%)	7184.6	1340.7	15-7967				B1	G	382897	-17103	4.27575
C1	D	1	DQ000985	400001	1485 (22.9%)	7797.6	1460.6	15-8611				C1	G	400006	6	0.0015
D1	D	1	DQ000985	400007	1484 (22.9%)	7795.1	1459.9	15-8611				D1	G	400296	296	0.074
A1	G	1	DQ000985	383453	1422 (21.7%)	7363.1	1659.3	1-8263		Comment: Mapper Geneious Sensitivity=custom Trim Before Mapping=Do not Trim minimum mapping quality 30 Map multiple best matches=To none parameters: allow gaps max 5% per read - maximum gap size 3; minimum overlap 35; minimum overlap identity 65%; word length 14; index word length 14; maximum mismatches per read 35%; Max ambiguity: 4		B1	H	357064	-42936	10.734
B1	G	1	DQ000985	382897	-	-	-	-	Merged and no merged separated			C1	H	372351	-27649	6.91225
C1	G	1	DQ000985	400006	-	-	-	-	R1 and R2 file separated			D1	H	372361	-27639	6.90975
D1	G	1	DQ000985	400296	-	-	-	-	R1 and R2 file separated			A1	P	400007	7	0.00175
A1	H	1	DQ000985	-	-	-	-	-	kraken/diamond pipeline testing	Comment: bwa mem -t 8 -M reference.fasta dataset_1A_merged.fastq > dataset_1A_merged_mapped.sam (OR (in case of the unmerged files) --> bwa mem -t 8 - reference.fasta dataset_1A_R1.fastq dataset_1A_R2. fastq > dataset_1A_mapped.sam) samtools view -bS dataset_1A_merged_mapped.sam | samtools sort -o dataset_1A_merged_mapped.bam PicardCommandLine MarkDuplicates INPUT=dataset_1A_merged_mapped.bam OUT…		B1	P	364101	-35899	8.97475
B1	H	1	DQ000985	357064	1581 (24.4%)	6934.1	1314.2	14-7711	BWA - SAMtools - PicardCommandLine MarkDuplicates			C1	P	400001	1	0.00025
C1	H	1	DQ000985	372351	1606 (24.8%)	7257.5	1362.3	15-8023				D1	P	400007	7	0.00175
D1	H	1	DQ000985	372361	1607 (24.8%)	7195.1	1506.8	0-8023	no coverage at the end			A1	Q	74755	-325245	81.3113
A1	O	1	DQ000985_HQ663890_FJ612601.1_MK133094	300875	2242 (34.7%)	5788.8	2277.4	0-8611	BWA/Samtools	Comment: BWA: Default, Samtools: samtools view -b -F 4, samtools sort		B1	Q	74231	-325769	81.4423
B1	O	1	DQ000985_HQ663890_FJ612601.1_MK133094	280671	306 (4.7%)	5549.6	2074.1	7-8137				C1	Q	80412	-319588	79.897
C1	O	1	DQ000985_HQ663890_FJ612601.1_MK133094	301084	2216 (34.3%)	5872.3	2187	8-8611				D1	Q	80416	-319584	79.896
D1	O	1	DQ000985_HQ663890_FJ612601.1_MK133094	299095	2265 (35.0%)	5830	2198.3	3-8611				A1	R	400023	23	0.00575
A1	P	1	DQ000985	400007	1484 (22.9%)	7795.1	1459.9	15-8611		For custom sensivity: minimum mapping quality: 10, Allowed gaps 5% maximum per read, Maximum gap size:3, Minimum overlap:18, Word length:14, Maximum mismatches per read: 10%, Index word length:12, Maximum ambiguity:4 parameters were used. Beside that; Trim paired read overhangs, Accuratellymap reads with errors to repeat regions and Search more thoroughly for poor matching reads options selected.		B1	R	364044	-35956	8.989
B1	P	1	DQ000985	364101	1518 (23.5%)	7183.6	1341.2	15-7967				C1	R	400001	1	0.00025
C1	P	1	DQ000985	400001	1485 (22.9%)	7797.6	1460.6	15-8611				D1	R	400003	3	0.00075
D1	P	1	DQ000985	400007	1484 (22.9%)	7795.1	1459.9	15-8611				A1	S	400248	248	0.062
A1	Q	1	DI370283	74755	5074 (78.9%)	240.6	77.5	0-358	Read number too low du to mapping parameter (due to Global alignment ?) https://secure.clcbio.com/helpspot/index.php?pg=kb.page&id=365	Map Reads to Reference (legacy version): Mismatch cost: 2 Insertion cost: 2 Deletion cost: 3 Length fraction: 0.5 Similarity: 0.8 Global alignment. ticked Conflict resolution: Ambiguity nucleotides (R, Y, etc.) Non-specific matches: Random		B1	S	372740	-27260	6.815
B1	Q	1	DQ000985_MS908425_HW047122	74231	-	-	-	-	Merged and no merged separated			C1	S	400001	1	0.00025
C1	Q	1	MS908425_HW047122	80412	-	-	-	-	R1 and R2 file separated			D1	S	400007	7	0.00175
D1	Q	1	DI370283	80416	-	-	-	-	R1 and R2 file separated			A1	T	400001	1	0.00025
A1	R	1	DQ000985	400023	1506 (23.3%)	7786.3	1458.7	15-8602		Comment: Minimum mapping quality=30 Mapper=Geneious Sensitivity=Low Sensitivity/Fastest Trim Before Mapping=Do not Trim Map multiple best matches=Randomly Allow Gaps;maximum per read =10%; maximum Gap Size = 3 Ignore words repeated more than=8 times Maximum Mismatches Per Read=10% Maximum Ambiguity=4		B1	T	364145	-35855	8.96375
B1	R	1	DQ000985	364044	1540 (23.8%)	7183	1341.3	15-7966				C1	T	400001	1	0.00025
C1	R	1	DQ000985	400001	1488 (23.0%)	7797.5	1460.8	15-8611				D1	T	400007	7	0.00175
D1	R	1	DQ000985	400003	1490 (23.0%)	7795	1460	15-8611				A1	Z	364516	-35484	8.871
A1	S	1	DQ000985	400248	1448 (22.4%)	7799.1	1460.2	15-8613		Comment: Mapper=Geneious Sensitivity=Medium-Low Sensitivity/Fast Trim Before Mapping=Randomly Trim paired read overhangs=yes Allow Gaps;maximum per read =10%; maximum Gap Size = 15 Ignore words repeated more than=12 times Maximum Mismatches Per Read=20% Maximum Ambiguity=4 Accurately map reads with errors to repeat regions=yes		B1	Z	366495	-33505	8.37625
B1	S	1	DQ000985	372740	-	-	-	-	Merged and no merged separated			C1	Z	400007	7	0.00175
C1	S	1	DQ000985	400001	1488 (23.0%)	7797.5	1460.8	15-8611				D1	Z	400026	26	0.0065
D1	S	1	DQ000985	400007	1487 (23.0%)	7795	1460	15-8611
A1	T	1	DQ000985	400001	1487 (23.0%)	7794.2	1459.8	15-8611		Comment: Mapper=Geneious Sensitivity=Medium-Low Sensitivity/Fast Trim Before Mapping=Randomly Trim paired read overhangs=yes Allow Gaps;maximum per read =10%; maximum Gap Size = 15 Ignore words repeated more than=12 times Maximum Mismatches Per Read=20% Maximum Ambiguity=4 Accurately map reads with errors to repeat regions=yes
B1	T	1	DQ000985	364145	1467 (22.6%)	7184.6	1340.7	15-7967
C1	T	1	DQ000985	400001	1485 (22.9%)	7797.6	1460.6	15-8611
D1	T	1	DQ000985	400007	1484 (22.9%)	7795.1	1459.9	15-8611
A1	Y	1	HQ656560	-	-	-	-	-	No ref
B1	Y	1	HQ656560	-	-	-	-	-	No ref
C1	Y	1	HQ656560	-	-	-	-	-	No ref
D1	Y	1	HQ656560	-	-	-	-	-	No ref
A1	Z	1	DQ000985	364516	1423 (21.9%)	7022.9	1602.4	1-7915		Comment: Mapper=Geneious Sensitivity=Medium-Low Sensitivity/Fast Trim Before Mapping=no Allow Gaps;maximum per read =10%; maximum Gap Size = 15 Ignore words repeated more than=12 times Maximum Mismatches Per Read=30% Maximum Ambiguity=4 Accurately map reads with errors to repeat regions=yes
B1	Z	1	DQ000985	366495	162 (2.1%)	7196.5	1552.5	1-8058
C1	Z	1	DQ000985	400007	1474 (22.8%)	7717.8	1651.7	1-8611
D1	Z	1	DQ000985	400026	1449 (22.0%)	7677.3	1733.1	1-8611
												400000

## Sheet: sample2_AJ606359
ID	PT1_id	Sample	reference found	Nb reads	identical site	Mean coverage	cov std dev	coverage range	comment	Mapping parameters			ID	PT1_id	Nb reads	Difference (nb read) with expectation	% difference (nb read) with expectation
A2	A	2	AJ606359, DQ000985	155466	3473 (51.1%)	2883.8	894.1	1-3421		Comment: Mapper=Geneious Sensitivity=Medium-Low Sensitivity/Fast Trim Before Mapping=Do not Trim Minimum mapping quality=30 Map multiple best matches=To none Trim paired read overhangs=yes Allow Gaps;maximum per read =10%; maximum Gap Size = 15 Ignore words repeated more than=12 times Maximum Mismatches Per Read=20% Maximum Ambiguity=4 Accurately map reads with errors to repeat regions=yes			A2	A	155466	-4054	2.54137
B2	A	2	AJ606359, DQ000985	151046	3456 (51.2%)	2802.4	845.7	1-3320					B2	A	151046	-8474	5.31219
C2	A	2	AJ606359, DQ000985	159564	3494 (52.6%)	3005.8	760.5	1-3457					C2	A	159564	44	0.0275827
D2	A	2	AJ606359, DQ000985	159632	3432 (51.6%)	3002.4	763.6	1-3457					D2	A	159632	112	0.0702106
A2	B	2	AJ606359, DQ000985	159550	3620 (55.9%)	3068.5	574.2	1-3457	no gap	Comment: "Masking mode = No masking Mismatch cost = 2 Cost of insertions and deletions = Linear gap cost Insertion cost = 3 Deletion cost = 3 Insertion open cost = 6 Insertion extend cost = 1 Deletion open cost = 6 Deletion extend cost = 1 Length fraction = 0.9 Similarity fraction = 0.95 Global alignment = No Non-specific match handling = Map randomly Output mode = Create stand-alone read mapping…			A2	B	159550	30	0.0188064
B2	B	2	AJ606359, DQ000985	151023	3642 (56.3%)	2957.1	546.6	9-3320					B2	B	151023	-8497	5.3266
C2	B	2	AJ606359, DQ000985	159530	3603 (55.7%)	3090.6	577.8	1-3457					C2	B	159530	10	0.00626881
D2	B	2	AJ606359, DQ000985	159553	3599 (55.6%)	3091.3	574	9-3457					D2	B	159553	33	0.0206871
A2	C	2	AJ606359, DQ000985	-	-	-	-	-	mapped contig instead of reads	Comment: Costum Sensitivity, extremly slow, min overlap=25, min overlap identity=80, word length=14, Index word length=12, Max mis per read=20, Max ambiguity=4			A2	D	159608	88	0.0551655
B2	C	2	AJ606359, DQ000985	-	-	-	-	-	mapped contig instead of reads				B2	D	151053	-8467	5.3078
C2	C	2	AJ606359, DQ000985	-	-	-	-	-	mapped contig instead of reads				C2	D	159574	54	0.0338516
D2	C	2	AJ606359, DQ000985	-	-	-	-	-	mapped contig instead of reads				D2	D	159634	114	0.0714644
A2	D	2	AJ606359, DQ000985	159608	3440 (51.7%)	3003.1	763.7	1-3457		Comment: Mapper=Geneious Sensitivity=Low Sensitivity/Fastest Trim Before Mapping=Do not Trim Map multiple best matches=Randomly Allow Gaps;maximum per read =10%; maximum Gap Size = 3 Ignore words repeated more than=8 times Maximum Mismatches Per Read=10% Maximum Ambiguity=4			A2	G	158759	-761	0.477056
B2	D	2	AJ606359, DQ000985	151053	3455 (51.1%)	2802.5	845.7	1-3320					B2	G	154859	-4661	2.92189
C2	D	2	AJ606359, DQ000985	159574	3489 (52.5%)	3005.8	760.3	1-3457					C2	G	160041	521	0.326605
D2	D	2	AJ606359, DQ000985	159634	3432 (51.6%)	3002.4	763.5	1-3457					D2	G	160075	555	0.347919
A2	G	2	AJ606359, DQ000985	158759	3571 (54.5%)	3038.3	639.6	1-3432		Comment: Mapper Geneious Sensitivity=custom Trim Before Mapping=Do not Trim minimum mapping quality 30 Map multiple best matches=to none parameters: allow gaps max 5% per read - maximum gap size 3; minimum overlap 37; minimum overlap identity 90%; word length 14; index word length 14; maximum mismatches per read 8%; Max ambiguity: 4			B2	H	148996	-10524	6.59729
B2	G	2	AJ606359, DQ000985	154859	-	-	-	-	Merged and no merged separated				C2	H	156545	-2975	1.86497
C2	G	2	AJ606359, DQ000985	160041	-	-	-	-	R1 and R2 file separated				D2	H	156628	-2892	1.81294
D2	G	2	AJ606359, DQ000985	160075	-	-	-	-	R1 and R2 file separated				A2	O	160127	607	0.380517
A2	H	2	AJ606359, DQ000985	-	-	-	-	-	kraken/diamond pipeline testing	Comment: bwa mem -t 8 -M reference.fasta dataset_1A_merged.fastq > dataset_1A_merged_mapped.sam (OR (in case of the unmerged files) --> bwa mem -t 8 - reference.fasta dataset_1A_R1.fastq dataset_1A_R2. fastq > dataset_1A_mapped.sam) samtools view -bS dataset_1A_merged_mapped.sam | samtools sort -o dataset_1A_merged_mapped.bam PicardCommandLine MarkDuplicates INPUT=dataset_1A_merged_mapped.bam OUT…			B2	O	154885	-4635	2.90559
B2	H	2	AJ606359, DQ000985	148996	3505 (54.2%)	2762	768.5	0-3227	BWA - SAMtools - PicardCommandLine MarkDuplicates				C2	O	159536	16	0.0100301
C2	H	2	AJ606359, DQ000985	156545	3561 (55.0%)	2994.9	656.5	0-3392					D2	O	159621	101	0.0633149
D2	H	2	AJ606359, DQ000985	156628	3541 (54.7%)	2961.3	723.5	0-3392					A2	Q	55090	-104430	65.4651
A2	O	2	AJ606359, DQ000985	160127	3435 (53.0%)	3016.1	746.6	0-3459	BWA/Samtools	Comment: BWA: Default, Samtools: samtools view -b -F 4, samtools sort			A2	R	159558	38	0.0238215
B2	O	2	AJ606359, DQ000985	154885	481 (7.4%)	2914.2	809.2	0-3386					B2	R	150980	-8540	5.35356
C2	O	2	AJ606359, DQ000985	159536	3509 (54.2%)	3052.1	669	0-3457					C2	R	159521	1	0.000626881
D2	O	2	AJ606359, DQ000985	159621	3492 (53.9%)	3017.8	737.3	0-3457					D2	R	159547	27	0.0169258
A2	P	2	DQ000985	-	-	-	-	-	No ref	For custom sensivity: minimum mapping quality: 10, Allowed gaps 5% maximum per read, Maximum gap size:3, Minimum overlap:18, Word length:14, Maximum mismatches per read: 10%, Index word length:12, Maximum ambiguity:4 parameters were used. Beside that; Trim paired read overhangs, Accuratellymap reads with errors to repeat regions and Search more thoroughly for poor matching reads options selected.			A2	S	159938	418	0.262036
B2	P	2	DQ000985	-	-	-	-	-	No ref				B2	S	154421	-5099	3.19646
C2	P	2	DQ000985	-	-	-	-	-	No ref				C2	S	159521	1	0.000626881
D2	P	2	DQ000985	-	-	-	-	-	No ref				D2	S	159557	37	0.0231946
A2	Q	2	AJ606359	55090	4762 (72.8%)	215.6	103.7	0-538	Read number too low du to mapping parameter (due to Global alignment ?) https://secure.clcbio.com/helpspot/index.php?pg=kb.page&id=365	Map Reads to Reference (legacy version): Mismatch cost: 2 Insertion cost: 2 Deletion cost: 3 Length fraction: 0.5 Similarity: 0.8 Global alignment. ticked Conflict resolution: Ambiguity nucleotides (R, Y, etc.) Non-specific matches: Random			A2	Z	151051	-8469	5.30905
B2	Q	2	HI647471 (AJ606359) MS908425_HI647466 (DQ000985)	-	-	-	-	-	Merged and no merged separated with different ref				B2	Z	152220	-7300	4.57623
C2	Q	2	HI647466 (DQ000985) AJ606359	-	-	-	-	-	R1 and R2 file separated with separate ref				C2	Z	162033	2513	1.57535
D2	Q	2	DI370283_MS908425 (DQ000985)	-	-	-	-	-	R1 and R2 file separated with separate ref				D2	Z	162167	2647	1.65935
A2	R	2	AJ606359, DQ000985	159558	3524 (54.5%)	3087.8	573.3	9-3451		Comment: Minimum mapping quality=30 Mapper=Geneious Sensitivity=Low Sensitivity/Fastest Trim Before Mapping=Do not Trim Map multiple best matches=Randomly Allow Gaps;maximum per read =10%; maximum Gap Size = 3 Ignore words repeated more than=8 times Maximum Mismatches Per Read=10% Maximum Ambiguity=4
B2	R	2	AJ606359, DQ000985	150980	3538 (54.7%)	2956.6	547	0-3320
C2	R	2	AJ606359, DQ000985	159521	3516 (54.3%)	3091.1	576.5	0-3457
D2	R	2	AJ606359, DQ000985	159547	3508 (54.2%)	3090.4	576.4	9-3457
A2	S	2	AJ606359, DQ000985	159938	3450 (53.3%)	3094.6	574.2	9-3459		Comment: Mapper=Geneious Sensitivity=Medium-Low Sensitivity/Fast Trim Before Mapping=Randomly Trim paired read overhangs=yes Allow Gaps;maximum per read =10%; maximum Gap Size = 15 Ignore words repeated more than=12 times Maximum Mismatches Per Read=20% Maximum Ambiguity=4 Accurately map reads with errors to repeat regions=yes
B2	S	2	AJ606359, DQ000985	154421	-	-	-	-	Merged and no merged separated with different ref
C2	S	2	AJ606359, DQ000985	159521	3517 (54.4%)	3091.2	576.1	9-3457
D2	S	2	AJ606359, DQ000985	159557	3494 (54.0%)	3091.4	574	9-3457
A2	T	2	DQ000985	-	-	-	-	-	No ref	Comment: Mapper=Geneious Sensitivity=Medium-Low Sensitivity/Fast Trim Before Mapping=Randomly Trim paired read overhangs=yes Allow Gaps;maximum per read =10%; maximum Gap Size = 15 Ignore words repeated more than=12 times Maximum Mismatches Per Read=20% Maximum Ambiguity=4 Accurately map reads with errors to repeat regions=yes
B2	T	2	DQ000985	-	-	-	-	-	No ref
C2	T	2	DQ000985	-	-	-	-	-	No ref
D2	T	2	DQ000985	-	-	-	-	-	No ref
A2	Y	2	FJ940223_HQ656560	-	-	-	-	-	No ref
B2	Y	2	FJ940223_HQ656560	-	-	-	-	-	No ref
C2	Y	2	FJ940223_HQ656560	-	-	-	-	-	No ref
D2	Y	2	FJ940223_HQ656560	-	-	-	-	-	No ref
A2	Z	2	AJ606359, DQ000985	151051	3504 (53.3%)	2894.9	656.2	1-3302		Comment: Mapper=Geneious Sensitivity=Medium-Low Sensitivity/Fast Trim Before Mapping=no Allow Gaps;maximum per read =10%; maximum Gap Size = 15 Ignore words repeated more than=12 times Maximum Mismatches Per Read=30% Maximum Ambiguity=4 Accurately map reads with errors to repeat regions=yes
B2	Z	2	AJ606359, DQ000985	152220	229 (3.0%)	2794.5	885.6	1-3339
C2	Z	2	AJ606359, DQ000985	162033	3384 (50.1%)	3015.6	695.1	2-3457
D2	Z	2	AJ606359, DQ000985	162167	3331 (48.7%)	2989.3	728.6	1-3457
												159520

## Sheet: sample2_DQ000985
ID	PT1_id	Sample	reference found	Nb reads	identical site	Mean coverage	cov std dev	coverage range	comment	Mapping parameters				ID	PT1_id	Nb reads	Difference (nb read) with expectation	% difference (nb read) with expectation
A2	A	2	AJ606359, DQ000985	234232	2604 (40.1%)	4538.2	1105.8	1-5169		Comment: Mapper=Geneious Sensitivity=Medium-Low Sensitivity/Fast Trim Before Mapping=Do not Trim Minimum mapping quality=30 Map multiple best matches=To none Trim paired read overhangs=yes Allow Gaps;maximum per read =10%; maximum Gap Size = 15 Ignore words repeated more than=12 times Maximum Mismatches Per Read=20% Maximum Ambiguity=4 Accurately map reads with errors to repeat regions=yes				A2	A	234232	-6248	2.59814
B2	A	2	AJ606359, DQ000985	225682	2499 (38.4%)	4348.5	1058.4	1-4911						B2	A	225682	-14798	6.15353
C2	A	2	AJ606359, DQ000985	240482	2569 (39.9%)	4624.5	1030.9	1-5220						C2	A	240482	2	0.00083167
D2	A	2	AJ606359, DQ000985	240498	2568 (39.5%)	4623.4	1029.9	1-5220						D2	A	240498	18	0.00748503
A2	B	2	AJ606359, DQ000985	240481	2689 (41.8%)	4652.5	879	9-5213		Comment: "Masking mode = No masking Mismatch cost = 2 Cost of insertions and deletions = Linear gap cost Insertion cost = 3 Deletion cost = 3 Insertion open cost = 6 Insertion extend cost = 1 Deletion open cost = 6 Deletion extend cost = 1 Length fraction = 0.9 Similarity fraction = 0.95 Global alignment = No Non-specific match handling = Map randomly Output mode = Create stand-alone read mapping…				A2	B	240481	1	0.000415835
B2	B	2	AJ606359, DQ000985	225668	2721 (42.3%)	4450	835.9	8-4911						B2	B	225668	-14812	6.15935
C2	B	2	AJ606359, DQ000985	240481	2672 (41.5%)	4688.3	881.9	9-5220						C2	B	240481	1	0.000415835
D2	B	2	AJ606359, DQ000985	240497	2670 (41.5%)	4686.9	881.4	9-5220						D2	B	240497	17	0.00706919
A2	C	2	AJ606359, DQ000985	-	-	-	-	-	mapped contig instead of reads	Comment: Costum Sensitivity, extremly slow, min overlap=25, min overlap identity=80, word length=14, Index word length=12, Max mis per read=20, Max ambiguity=4				A2	D	240488	8	0.00332668
B2	C	2	AJ606359, DQ000985	-	-	-	-	-	mapped contig instead of reads					B2	D	225687	-14793	6.15145
C2	C	2	AJ606359, DQ000985	-	-	-	-	-	mapped contig instead of reads					C2	D	240482	2	0.00083167
D2	C	2	AJ606359, DQ000985	-	-	-	-	-	mapped contig instead of reads					D2	D	240498	18	0.00748503
A2	D	2	AJ606359, DQ000985	240488	2571 (39.6%)	4624.8	1030.4	1-5220		Comment: Mapper=Geneious Sensitivity=Low Sensitivity/Fastest Trim Before Mapping=Do not Trim Map multiple best matches=Randomly Allow Gaps;maximum per read =10%; maximum Gap Size = 3 Ignore words repeated more than=8 times Maximum Mismatches Per Read=10% Maximum Ambiguity=4				A2	G	237870	-2610	1.08533
B2	D	2	AJ606359, DQ000985	225687	2498 (38.4%)	4348.5	1058.4	1-4911						B2	G	231089	-9391	3.90511
C2	D	2	AJ606359, DQ000985	240482	2569 (39.9%)	4624.5	1030.9	1-5220						C2	G	240821	341	0.1418
D2	D	2	AJ606359, DQ000985	240498	2568 (39.5%)	4623.4	1029.9	1-5220						D2	G	240833	353	0.14679
A2	G	2	AJ606359, DQ000985	237870	2559 (39.8%)	4637.5	854.1	8-5138		Comment: Mapper Geneious Sensitivity=custom Trim Before Mapping=Do not Trim minimum mapping quality 30 Map multiple best matches=to none parameters: allow gaps max 5% per read - maximum gap size 3; minimum overlap 37; minimum overlap identity 90%; word length 14; index word length 14; maximum mismatches per read 8%; Max ambiguity: 4				B2	H	223096	-17384	7.22888
B2	G	2	AJ606359, DQ000985	231089	-	-	-	-	Merged and no merged separated					C2	H	233896	-6584	2.73786
C2	G	2	AJ606359, DQ000985	240821	-	-	-	-	R1 and R2 file separated					D2	H	233927	-6553	2.72497
D2	G	2	AJ606359, DQ000985	240833	-	-	-	-	R1 and R2 file separated					A2	O	240723	243	0.101048
A2	H	2	AJ606359, DQ000985	-	-	-	-	-	kraken/diamond pipeline testing	Comment: bwa mem -t 8 -M reference.fasta dataset_1A_merged.fastq > dataset_1A_merged_mapped.sam (OR (in case of the unmerged files) --> bwa mem -t 8 - reference.fasta dataset_1A_R1.fastq dataset_1A_R2. fastq > dataset_1A_mapped.sam) samtools view -bS dataset_1A_merged_mapped.sam | samtools sort -o dataset_1A_merged_mapped.bam PicardCommandLine MarkDuplicates INPUT=dataset_1A_merged_mapped.bam OUT…				B2	O	232141	-8339	3.46765
B2	H	2	AJ606359, DQ000985	223096	2550 (39.6%)	4235.8	1037.2	0-4786	BWA - SAMtools - PicardCommandLine MarkDuplicates					C2	O	240484	4	0.00166334
C2	H	2	AJ606359, DQ000985	233896	2642 (41.1%)	4497.7	1003.6	0-5060						D2	O	240519	39	0.0162176
D2	H	2	AJ606359, DQ000985	233927	2637 (41.0%)	4496.4	1003.1	0-5060						A2	P	241868	1388	0.577179
A2	O	2	AJ606359, DQ000985	240723	2544 (39.5%)	4599.3	1086.1	0-5220	BWA/Samtools	Comment: BWA: Default, Samtools: samtools view -b -F 4, samtools sort				B2	P	226968	-13512	5.61876
B2	O	2	AJ606359, DQ000985	232141	300 (4.7%)	4473.4	1090.4	0-5083						C2	P	241840	1360	0.565536
C2	O	2	AJ606359, DQ000985	240484	2568 (39.9%)	4624.5	1031	0-5220						D2	P	241868	1388	0.577179
D2	O	2	AJ606359, DQ000985	240519	2563 (39.8%)	4623.2	1030.3	0-5220						A2	R	240495	15	0.00623752
A2	P	2	DQ000985	241868	2525 (39.2%)	4648.8	1013.5	0-5829		For custom sensivity: minimum mapping quality: 10, Allowed gaps 5% maximum per read, Maximum gap size:3, Minimum overlap:18, Word length:14, Maximum mismatches per read: 10%, Index word length:12, Maximum ambiguity:4 parameters were used. Beside that; Trim paired read overhangs, Accuratellymap reads with errors to repeat regions and Search more thoroughly for poor matching reads options selected.				B2	R	225631	-14849	6.17473
B2	P	2	DQ000985	226968	2545 (39.5%)	4374.3	1043.3	1-5515						C2	R	240481	1	0.000415835
C2	P	2	DQ000985	241840	2536 (39.4%)	4650	1014	1-5829						D2	R	240493	13	0.00540585
D2	P	2	DQ000985	241868	2525 (39.2%)	4648.8	1013.5	1-5829						A2	S	240665	185	0.0769295
A2	Q	2	AJ606359	-	-	-	-	-		Map Reads to Reference (legacy version): Mismatch cost: 2 Insertion cost: 2 Deletion cost: 3 Length fraction: 0.5 Similarity: 0.8 Global alignment. ticked Conflict resolution: Ambiguity nucleotides (R, Y, etc.) Non-specific matches: Random				B2	S	230840	-9640	4.00865
B2	Q	2	HI647471 (AJ606359) MS908425_HI647466 (DQ000985)	-	-	-	-	-	Merged and no merged separated with different ref					C2	S	240481	1	0.000415835
C2	Q	2	HI647466 (DQ000985) AJ606359	-	-	-	-	-	R1 and R2 file separated with separate ref					D2	S	240495	15	0.00623752
D2	Q	2	DI370283_MS908425 (DQ000985)	-	-	-	-	-	R1 and R2 file separated with separate ref					A2	T	291887	51407	21.3768
A2	R	2	AJ606359, DQ000985	240495	2587 (40.2%)	4681.8	880.5	9-5213		Comment: Minimum mapping quality=30 Mapper=Geneious Sensitivity=Low Sensitivity/Fastest Trim Before Mapping=Do not Trim Map multiple best matches=Randomly Allow Gaps;maximum per read =10%; maximum Gap Size = 3 Ignore words repeated more than=8 times Maximum Mismatches Per Read=10% Maximum Ambiguity=4				B2	T	274526	34046	14.1575
B2	R	2	AJ606359, DQ000985	225631	2608 (40.5%)	4449.9	836	8-4911						C2	T	291902	51422	21.3831
C2	R	2	AJ606359, DQ000985	240481	2570 (39.9%)	4688.4	881.9	9-5220						D2	T	291919	51439	21.3901
D2	R	2	AJ606359, DQ000985	240493	2565 (39.9%)	4687	881.4	9-5220						A2	Z	226246	-14234	5.919
A2	S	2	AJ606359, DQ000985	240665	2544 (39.5%)	4689.9	881.6	9-5220		Comment: Mapper=Geneious Sensitivity=Medium-Low Sensitivity/Fast Trim Before Mapping=Randomly Trim paired read overhangs=yes Allow Gaps;maximum per read =10%; maximum Gap Size = 15 Ignore words repeated more than=12 times Maximum Mismatches Per Read=20% Maximum Ambiguity=4 Accurately map reads with errors to repeat regions=yes				B2	Z	227072	-13408	5.57552
B2	S	2	AJ606359, DQ000985	230840	-	-	-	-	Merged and no merged separated with different ref					C2	Z	240486	6	0.00249501
C2	S	2	AJ606359, DQ000985	240481	2570 (39.9%)	4688.4	881.9	9-5220						D2	Z	240502	22	0.00914837
D2	S	2	AJ606359, DQ000985	240495	2558 (39.7%)	4687.2	881.1	9-5220
A2	T	2	DQ000985	291887	1970 (30.1%)	5580.4	1660.9	1-8487	over estimation due to one ref only + relax parameter ?	Comment: Mapper=Geneious Sensitivity=Medium-Low Sensitivity/Fast Trim Before Mapping=Randomly Trim paired read overhangs=yes Allow Gaps;maximum per read =10%; maximum Gap Size = 15 Ignore words repeated more than=12 times Maximum Mismatches Per Read=20% Maximum Ambiguity=4 Accurately map reads with errors to repeat regions=yes
B2	T	2	DQ000985	274526	1823 (27.8%)	5265.2	1651.7	1-8148
C2	T	2	DQ000985	291902	1963 (30.3%)	5583.6	1662.1	1-8147
D2	T	2	DQ000985	291919	1961 (30.0%)	5581.4	1661.1	1-8487
A2	Y	2	FJ940223_HQ656560	-	-	-	-	-	No ref
B2	Y	2	FJ940223_HQ656560	-	-	-	-	-	No ref
C2	Y	2	FJ940223_HQ656560	-	-	-	-	-	No ref
D2	Y	2	FJ940223_HQ656560	-	-	-	-	-	No ref
A2	Z	2	AJ606359, DQ000985	226246	2581 (40.1%)	4329.5	1063.2	1-4912		Comment: Mapper=Geneious Sensitivity=Medium-Low Sensitivity/Fast Trim Before Mapping=no Allow Gaps;maximum per read =10%; maximum Gap Size = 15 Ignore words repeated more than=12 times Maximum Mismatches Per Read=30% Maximum Ambiguity=4 Accurately map reads with errors to repeat regions=yes
B2	Z	2	AJ606359, DQ000985	227072	169 (2.3%)	4370.3	1128.9	1-4972
C2	Z	2	AJ606359, DQ000985	240486	2581 (39.6%)	4543.7	1187.8	1-5220
D2	Z	2	AJ606359, DQ000985	240502	2545 (39.0%)	4542.7	1186.7	1-5220
												240480

## Sheet: sample_3
ID	PT3_id	Sample	reference found	Nb reads	identical site	Mean coverage	cov std dev	coverage range	comment	Mapping parameters			ID	PT1_id	Nb reads	Difference (nb read) with expectation	% difference (nb read) with expectation
A3	A	3	DQ000985	393593	2 (0.0%)	15539.9	3235.9	15-16876		Comment: Mapper=Geneious Sensitivity=Medium-Low Sensitivity/Fast Trim Before Mapping=Do not Trim Minimum mapping quality=30 Map multiple best matches=To none Trim paired read overhangs=yes Allow Gaps;maximum per read =10%; maximum Gap Size = 15 Ignore words repeated more than=12 times Maximum Mismatches Per Read=20% Maximum Ambiguity=4 Accurately map reads with errors to repeat regions=yes			A3	A	393593	-6407	1.60175
B3	A	3	DQ000985	199997	2 (0.0%)	12478.3	2594.2	15-13593		Comment: Mapper=Geneious Sensitivity=Medium-Low Sensitivity/Fast Trim Before Mapping=Do not Trim Minimum mapping quality=30 Map multiple best matches=To none Trim paired read overhangs=yes Allow Gaps;maximum per read =10%; maximum Gap Size = 15 Ignore words repeated more than=12 times Maximum Mismatches Per Read=20% Maximum Ambiguity=4 Accurately map reads with errors to repeat regions=yes			B3	A	199997	-200003	50.0008
C3	A	3	DQ000985	98427	41 (0.6%)	1531.1	417.1	1-1821	Maximum Mismatches Per Read=30% does impact	Comment: Mapper=Geneious Sensitivity=Medium Sensitivity/Fast Trim Before Mapping=Do not Trim Minimum mapping quality=30 Map multiple best matches=To none Trim paired read overhangs=yes Allow Gaps;maximum per read =15%; maximum Gap Size = 50 Ignore words repeated more than=12 times Maximum Mismatches Per Read=30% Maximum Ambiguity=4 Accurately map reads with errors to repeat regions=yes			C3	A	98427	-301573	75.3932
D3	A	3	DQ000985	393289	14 (0.2%)	11050.4	2281.1	14-12079		Comment: Mapper=Geneious Sensitivity=Medium-Low Sensitivity/Fast Trim Before Mapping=Do not Trim Minimum mapping quality=30 Map multiple best matches=To none Trim paired read overhangs=yes Allow Gaps;maximum per read =10%; maximum Gap Size = 15 Ignore words repeated more than=12 times Maximum Mismatches Per Read=20% Maximum Ambiguity=4 Accurately map reads with errors to repeat regions=yes			D3	A	393289	-6711	1.67775
A3	B	3	DQ000985	398409	18 (0.3%)	11131.3	2292.9	14-12198		Comment: "Masking mode = No masking Mismatch cost = 2 Cost of insertions and deletions = Linear gap cost Insertion cost = 3 Deletion cost = 3 Insertion open cost = 6 Insertion extend cost = 1 Deletion open cost = 6 Deletion extend cost = 1 Length fraction = 0.9 Similarity fraction = 0.95 Global alignment = No Non-specific match handling = Map randomly Output mode = Create stand-alone read mapping…			A3	B	398409	-1591	0.39775
B3	B	3	DQ000985	199995	7 (0.1%)	12502.6	2539.6	15-13588					B3	B	199995	-200005	50.0012
C3	B	3	DQ000985	98022	46 (0.7%)	1576.8	311	3-1814					C3	B	98022	-301978	75.4945
D3	B	3	DQ000985	391777	18 (0.3%)	11022.7	2267.8	14-12033					D3	B	391777	-8223	2.05575
A3	C	3	DQ000985	-	-	-	-	-	mapped contig instead of reads	Comment: Costum Sensitivity, extremly slow, min overlap=25, min overlap identity=80, word length=14, Index word length=12, Max mis per read=20, Max ambiguity=4			A3	D	344072	-55928	13.982
B3	C	3	DQ000985	-	-	-	-	-	mapped contig instead of reads				B3	D	199997	-200003	50.0008
C3	C	3	DQ000985	-	-	-	-	-	mapped contig instead of reads				C3	D	97840	-302160	75.54
D3	C	3	DQ000985	-	-	-	-	-	mapped contig instead of reads				D3	D	393289	-6711	1.67775
A3	D	3	DQ000985	344072	20 (0.3%)	8456	1735.5	9-9285		Comment: Mapper=Geneious Sensitivity=Low Sensitivity/Fastest Trim Before Mapping=Do not Trim Map multiple best matches=Randomly Allow Gaps;maximum per read =10%; maximum Gap Size = 3 Ignore words repeated more than=8 times Maximum Mismatches Per Read=10% Maximum Ambiguity=4			A3	G	400000	0	0
B3	D	3	DQ000985	199997	2 (0.0%)	12478.3	2594.2	15-13593					B3	G	199998	-200002	50.0005
C3	D	3	DQ000985	97840	41 (0.6%)	1580.8	311.9	3-1819					C3	G	87273	-312727	78.1818
D3	D	3	DQ000985	393289	14 (0.2%)	11050.4	2281.1	14-12079					D3	G	393306	-6694	1.6735
A3	G	3	DQ000985	400000	27 (0.4%)	15160.4	4190.9	1-16989	at least 3 read of tomato origin	Comment: Mapper Geneious Sensitivity=custom Trim Before Mapping=Do not Trim minimum mapping quality 30 Map multiple best matches=To none parameters: allow gaps max 5% per read - maximum gap size 3; minimum overlap 35; minimum overlap identity 65%; word length 14; index word length 14; maximum mismatches per read 35%; Max ambiguity: 4			B3	H	12025	-387975	96.9938
B3	G	3	DQ000985	199998	2 (0.0%)	11815	3769.5	1-13593					D3	H	135485	-264515	66.1287
C3	G	3	DQ000985	87273	-	-	-	-	R1 and R2 file separated				A3	O	213102	-186898	46.7245
D3	G	3	DQ000985	393306	-	-	-	-	R1 and R2 file separated				B3	O	175122	-224878	56.2195
A3	H	3	DQ000985	-	-	-	-	-	kraken/diamond pipeline testing	Comment: bwa mem -t 8 -M reference.fasta dataset_1A_merged.fastq > dataset_1A_merged_mapped.sam (OR (in case of the unmerged files) --> bwa mem -t 8 - reference.fasta dataset_1A_R1.fastq dataset_1A_R2. fastq > dataset_1A_mapped.sam) samtools view -bS dataset_1A_merged_mapped.sam | samtools sort -o dataset_1A_merged_mapped.bam PicardCommandLine MarkDuplicates INPUT=dataset_1A_merged_mapped.bam OUT…			C3	O	46690	-353310	88.3275
B3	H	3	DQ000985	12025	92 (1.4%)	750.1	155.2	1-801	BWA - SAMtools - PicardCommandLine MarkDuplicates				D3	O	263382	-136618	34.1545
C3	H	3	DQ000985	-	-	-	-	-	incorrect pairing issue				A3	P	393306	-6694	1.6735
D3	H	3	DQ000985	135485	29 (0.5%)	3895.9	810.1	5-4255					B3	P	199998	-200002	50.0005
A3	O	3	DQ000985_FJ612601_HG976946_HQ663890_HQ663891_HQ663892_HQ663893_JX417070_JX866666_KJ018165_MK133092_MK133094 - HQ663890.1	213102	10 (0.1%)	8305.5	3038.6	3-11615	BWA/Samtools	Comment: BWA: Default, Samtools: samtools view -b -F 4, samtools sort			C3	P	98596	-301404	75.351
B3	O	3	DQ000985_FJ612601_HG976946_HQ663890_HQ663891_HQ663892_HQ663893_JX417070_JX866666_KJ018165_MK133092_MK133094 - HQ663890.1	175122	7 (0.1%)	10943.3	3313.4	7-13539					D3	P	393306	-6694	1.6735
C3	O	3	DQ000985_FJ612601_HG976946_HQ663890_HQ663891_HQ663892_HQ663893_JX417070_JX866666_KJ018165_MK133092_MK133094 - HQ663890.1	46690	215 (3.4%)	917.1	457.8	0-1747					A3	Q	75182	-324818	81.2045
D3	O	3	DQ000985_FJ612601_HG976946_HQ663890_HQ663891_HQ663892_HQ663893_JX417070_JX866666_KJ018165_MK133092_MK133094 - HQ663890.1	263382	30 (0.5%)	7762	3246.9	5-11921					B3	Q	40473	-359527	89.8818
A3	P	3	DQ000985	393306	57 (0.9%)	10412.3	3398	1-12079	A=D for lab P	For custom sensivity: minimum mapping quality: 10, Allowed gaps 5% maximum per read, Maximum gap size:3, Minimum overlap:18, Word length:14, Maximum mismatches per read: 10%, Index word length:12, Maximum ambiguity:4 parameters were used. Beside that; Trim paired read overhangs, Accuratellymap reads with errors to repeat regions and Search more thoroughly for poor matching reads options selected.			A3	R	184626	-215374	53.8435
B3	P	3	DQ000985	199998	2 (0.0%)	11782	3815.4	1-13593					B3	R	199997	-200003	50.0008
C3	P	3	DQ000985	98596	41 (0.6%)	1584.1	312.4	3-1822					C3	R	93095	-306905	76.7262
D3	P	3	DQ000985	393306	57 (0.9%)	10412.3	3398	1-12079					D3	R	392943	-7057	1.76425
A3	Q	3	MS908425 (DQ000985)	75182	20 (0.3%)	422.8	130.8	0-662	Read number too low du to mapping parameter (due to Global alignment ?) https://secure.clcbio.com/helpspot/index.php?pg=kb.page&id=365	Map Reads to Reference (legacy version): Mismatch cost: 2 Insertion cost: 2 Deletion cost: 3 Length fraction: 0.5 Similarity: 0.8 Global alignment. ticked Conflict resolution: Ambiguity nucleotides (R, Y, etc.) Non-specific matches: Random			A3	S	397868	-2132	0.533
B3	Q	3	DI370283 (DQ000985)	40473	20 (0.3%)	505.3	105.1	0-561					B3	S	199997	-200003	50.0008
C3	Q	3	HI647466_DI370283 (DQ000985)	-	-	-	-	-	R1 and R2 file separated with separate ref				C3	S	97840	-302160	75.54
D3	Q	3	DI370283_MS908425 (DQ000985)	-	-	-	-	-	R1 and R2 file separated with separate ref				D3	S	393289	-6711	1.67775
A3	R	3	DQ000985	184626	3026 (47.4%)	1257.3	252.4	0-1456	For 3A, the remaining reads seem very small	Comment: Minimum mapping quality=30 Mapper=Geneious Sensitivity=Low Sensitivity/Fastest Trim Before Mapping=Do not Trim Map multiple best matches=Randomly Allow Gaps;maximum per read =10%; maximum Gap Size = 3 Ignore words repeated more than=8 times Maximum Mismatches Per Read=10% Maximum Ambiguity=4			A3	T	386674	-13326	3.3315
B3	R	3	DQ000985	199997	2 (0.0%)	12478.3	2594.2	15-13593					B3	T	199997	-200003	50.0008
C3	R	3	DQ000985	93095	41 (0.6%)	1561	308.3	3-1797					C3	T	97840	-302160	75.54
D3	R	3	DQ000985	392943	14 (0.2%)	11046.2	2280.2	14-12077					D3	T	393289	-6711	1.67775
A3	S	3	DQ000985	397868	51 (0.8%)	5007.8	1008.7	8-5566		Comment: Mapper=Geneious Sensitivity=Medium-Low Sensitivity/Fast Trim Before Mapping=Randomly Trim paired read overhangs=yes Allow Gaps;maximum per read =10%; maximum Gap Size = 15 Ignore words repeated more than=12 times Maximum Mismatches Per Read=20% Maximum Ambiguity=4 Accurately map reads with errors to repeat regions=yes			A3	Z	351610	-48390	12.0975
B3	S	3	DQ000985	199997	2 (0.0%)	12478.3	2594.2	15-13593					B3	Z	200004	-199996	49.999
C3	S	3	DQ000985	97840	41 (0.6%)	1580.8	311.9	3-1819					C3	Z	98427	-301573	75.3932
D3	S	3	DQ000985	393289	14 (0.2%)	11050.4	2281.1	14-12079					D3	Z	393321	-6679	1.66975
A3	T	3	DQ000985	386674	14 (0.2%)	10903.9	2249.6	14-11913		Comment: Mapper=Geneious Sensitivity=Medium-Low Sensitivity/Fast Trim Before Mapping=Randomly Trim paired read overhangs=yes Allow Gaps;maximum per read =10%; maximum Gap Size = 15 Ignore words repeated more than=12 times Maximum Mismatches Per Read=20% Maximum Ambiguity=4 Accurately map reads with errors to repeat regions=yes
B3	T	3	DQ000985	199997	2 (0.0%)	12478.3	2594.2	1-13593
C3	T	3	DQ000985	97840	41 (0.6%)	1580.8	311.9	3-1819
D3	T	3	DQ000985	393289	14 (0.2%)	11050.4	2281.1	1-12079
A3	Y	3	HQ656560	-	-	-	-	-	No ref
B3	Y	3	HQ656560	-	-	-	-	-	No ref
C3	Y	3	HQ656560	-	-	-	-	-	No ref
D3	Y	3	HQ656560	-	-	-	-	-	No ref
A3	Z	3	DQ000985	351610	260 (4.1%)	3174	637.4	0-3554		Comment: Mapper=Geneious Sensitivity=Medium-Low Sensitivity/Fast Trim Before Mapping=no Allow Gaps;maximum per read =10%; maximum Gap Size = 15 Ignore words repeated more than=12 times Maximum Mismatches Per Read=30% Maximum Ambiguity=4 Accurately map reads with errors to repeat regions=yes
B3	Z	3	DQ000985	200004	2 (0.0%)	11772.1	3828.2	2-13593
C3	Z	3	DQ000985	98427	41 (0.6%)	1531.1	417.1	1-1821
D3	Z	3	DQ000985	393321	8 (0.1%)	10503.8	3267.7	1-12079
											400000
