# Supplementary material for: Detection of single nucleotide polymorphisms in virus genomes assembled from high-throughput sequencing data: large-scale performance testing of sequence analysis strategies
Source: PeerJ. 2023 Aug 16;11:e15816. doi: 10.7717/peerj.15816 (PMC10439718; doi:10.7717/peerj.15816)
Supplement: Supplemental Information 5 [file peerj-11-15816-s005.xlsx]

## Sheet: Frequencies_analysis
60% freq mutations
	Lab	1BE	1BF	1BG	1CE	1CF	1CG	1DE	1DF	1DG	2BE	2BF	2BG	2CE	2CF	2CG	2DE	2DF	2DG
	A	1	1	1	1	0.666667	0.666667	1	0.666667	0.666667	1	1	1	1	1	1	1	1	1
	B	1	1	1	0.666667	0.666667	0.666667	0.666667	0.666667	0.666667	1	1	1	1	1	1	1	1	1
	C	0.333333	0.333333	0.333333	0.333333	0.333333	0.333333	0.333333	0.333333	0.333333	1	1	1	1	1	1	1	1	1
	D	1	1	1	1	1	1	1	1	1	1	1	1	1	1	1	1	1	1
	G	1	1	1	1	0.666667	0.666667	1	0.666667	0.666667	1	1	1	1	1	1	1	1	1
	H	1	1	1	1	1	1	1	1	1	1	1	1	1	1	1	1	1	1
	O	1	1	1	1	1	1	1	1	1	1	1	1	1	1	1	1	1	1
	P	1	1	1	1	0.666667	0.666667	1	0.666667	0.666667	1	1	1	1	1	1	1	1	1
	Q	1	1	1	1	1	1	1	1	1	1	1	1	1	1	1	1	1	1
	R	1	1	1	1	1	0.666667	1	0.666667	0.666667	1	1	1	1	1	1	1	1	1
	S	1	1	1	1	0.666667	0.666667	1	0.666667	0.666667	1	1	1	1	1	1	1	1	1
	T	1	1	1	1	0.666667	0.666667	1	0.666667	0.666667	1	1	1	1	1	1	1	1	1
	Y	1	1	1	1	1	1	1	1	1	1	1	1	1	1	1	1	1	1
	Z	1	1	1	1	1	1	1	1	1	1	1	1	1	1	1	1	1	1
	TOTAL	0.952381	0.952381	0.952381	0.928571	0.809524	0.785714	0.928571	0.785714	0.785714	1	1	1	1	1	1	1	1	1
	expected	3	3	3	3	3	3	3	3	3	1	1	1	1	1	1	1	1	1
20% freq mutations
	Lab	1BE	1BF	1BG	1CE	1CF	1CG	1DE	1DF	1DG	2BE	2BF	2BG	2CE	2CF	2CG	2DE	2DF	2DG	3BE	3BF	3BG	3CE	3CF	3CG	3DE	3DF	3DG
	A	1	1	1	1	1	1	1	1	1	1	1	1	1	1	1	1	1	1	1	1	1	1	1	1	1	1	1
	B	1	1	1	1	1	1	1	1	1	1	1	1	1	1	1	1	1	1	1	1	1	1	1	1	1	1	1
	C	0.333333	0.333333	0.333333	0.333333	0.333333	0.333333	0.333333	0.333333	0.333333	1	1	1	1	1	1	1	1	1	1	1	1	1	1	1	1	1	1
	D	1	1	1	1	1	1	1	1	1	1	1	1	0	1	1	1	1	1	1	1	1	1	1	1	1	1	1
	G	1	1	1	1	1	1	1	1	1	1	1	1	1	1	1	1	1	1	1	1	1	1	1	1	1	1	1
	H	1	1	1	1	1	1	1	1	1	0	1	1	1	1	1	1	1	1	0	1	1	1	1	1	1	1	1
	O	1	1	1	1	1	1	1	1	1	1	1	1	1	1	1	1	1	1	1	1	1	1	1	1	1	1	1
	P	1	1	1	1	1	1	1	1	1	1	1	1	1	1	1	1	1	1	1	1	1	1	1	1	1	1	1
	Q	1	1	1	1	1	1	1	1	1	1	1	1	1	1	1	1	1	1	1	1	1	1	1	1	1	1	1
	R	1	1	1	1	1	1	1	1	1	1	1	1	1	1	1	1	1	1	1	1	1	1	1	1	1	1	1
	S	1	1	1	1	1	1	1	1	1	1	1	1	1	1	1	1	1	1	1	1	1	1	1	1	1	1	1
	T	1	1	1	1	1	1	1	1	1	1	1	1	1	1	1	1	1	1	1	1	1	1	1	1	1	1	1
	Y	0	0	0	0	0	0	0	0	0	1	1	1	1	1	1	1	1	1	0	0	0	0	0	0	0	0	0
	Z	1	1	1	1	1	1	1	1	1	1	1	1	1	1	1	1	1	1	1	1	1	1	1	1	1	1	1
	TOTAL	0.880952	0.880952	0.880952	0.880952	0.880952	0.880952	0.880952	0.880952	0.880952	0.928571	1	1	0.928571	1	1	1	1	1	0.857143	0.928571	0.928571	0.928571	0.928571	0.928571	0.928571	0.928571	0.928571
	expected	3	3	3	3	3	3	3	3	3	1	1	1	1	1	1	1	1	1	3	3	3	3	3	3	3	3	3
12% freq mutations
	Lab	3BE	3BF	3BG	3CE	3CF	3CG	3DE	3DF	3DG
	A	1	1	1	1	0.5	0.5	1	0.5	0.5
	B	1	1	1	0.5	0.5	0.5	1	1	1
	C	1	1	1	1	0.5	0.5	1	0.5	0.5
	D	1	1	1	1	1	1	1	1	1
	G	1	1	1	1	0.5	0.5	1	0.5	0.5
	H	0	1	1	1	1	1	1	1	1
	O	1	1	1	0.5	0.5	0.5	1	1	1
	R	1	1	1	1	0.5	0.5	1	0.5	0.5
	S	1	1	1	1	0.5	0.5	1	0.5	0.5
	T	1	1	1	1	0.5	0.5	1	0.5	0.5
	Z	1	1	1	1	1	1	1	1	1
	TOTAL	0.909091	1	1	0.909091	0.636364	0.636364	1	0.727273	0.727273
	expected	2	2	2	2	2	2	2	2	2
10% freq mutations
	Lab	1BE	1BF	1BG	1CE	1CF	1CG	1DE	1DF	1DG	2BE	2BF	2BG	2CE	2CF	2CG	2DE	2DF	2DG
	A	1	1	1	1	1	1	1	1	1	1	1	1	1	1	1	1	1	1
	B	1	1	1	1	1	1	1	1	1	1	1	1	1	1	1	1	1	1
	C	0.333333	0.333333	0.333333	0.333333	0.333333	0.333333	0.333333	0.333333	0.333333	1	1	1	1	1	1	1	1	1
	D	1	1	1	1	1	1	1	1	1	1	1	1	0	1	1	1	1	1
	G	1	1	1	1	1	1	1	1	1	1	1	1	1	1	1	1	1	1
	H	1	1	0.666667	1	1	1	1	1	1	0	1	1	1	1	1	1	1	1
	O	1	1	1	1	1	1	1	1	1	1	1	1	1	1	1	1	1	1
	P	0	0	0	0	0	0	0	0	0	1	1	1	1	1	1	1	1	1
	Q	0	0	0	0	0	0	0	0	0	1	1	1	1	1	1	1	1	1
	R	1	1	1	1	1	1	1	1	1	1	1	1	1	1	1	1	1	1
	S	1	1	1	1	1	1	1	1	1	1	1	1	1	1	1	1	1	1
	T	0.666667	1	1	0.333333	0.333333	0.333333	0.333333	0.333333	0.333333	1	1	1	1	1	1	1	1	1
	Z	1	1	1	1	1	1	1	1	1	1	1	1	1	1	1	1	1	1
	TOTAL	0.769231	0.794872	0.769231	0.74359	0.74359	0.74359	0.74359	0.74359	0.74359	0.923077	1	1	0.923077	1	1	1	1	1
	expected	3	3	3	3	3	3	3	3	3	1	1	1	1	1	1	1	1	1
06% freq mutations
	Lab	1BE	1BF	1BG	1CE	1CF	1CG	1DE	1DF	1DG	2BE	2BF	2BG	2CE	2CF	2CG	2DE	2DF	2DG	3BE	3BF	3BG	3CE	3CF	3CG	3DE	3DF	3DG
	A	1	0.666667	0.666667	1	0.666667	0.666667	1	0.666667	0.666667	1	1	1	1	1	1	1	1	1	1	1	1	1	1	1	1	1	1
	B	1	0.666667	0.666667	1	0.666667	0.666667	1	0.666667	0.666667	1	1	1	1	1	1	1	1	1	1	1	1	1	1	1	1	1	1
	C	0.333333	0.333333	0.333333	0.333333	0.333333	0.333333	0.333333	0.333333	0.333333	1	1	0	1	1	1	1	1	1	0.666667	0.666667	0.666667	0.666667	0.666667	0.666667	0.666667	0.666667	0.666667
	D	1	0.666667	0.666667	1	0.666667	0.666667	1	0.666667	0.666667	1	1	1	0	1	1	1	1	1	1	1	1	1	1	1	1	1	1
	G	1	1	1	1	1	1	1	1	1	1	1	1	1	1	1	1	1	1	1	1	1	1	1	1	1	1	1
	H	1	1	1	1	1	1	1	1	1	0	1	1	1	1	0	1	1	1	0	1	1	1	1	1	1	1	1
	O	1	0.666667	0.666667	1	0.666667	0.666667	1	0.666667	0.666667	1	1	1	1	1	1	1	1	1	1	1	1	1	1	1	1	1	1
	P	0	0	0	0	0	0	0	0	0	0	1	1	0	1	1	0	1	1	0	0	0	0	0	0	0	0	0
	Q	0	0	0	0	0	0	0	0	0	0	1	1	0	1	1	0	1	1	0	0	0	0	0	0	0	0	0
	R	1	0.666667	0.666667	1	0.666667	0.666667	1	0.666667	0.666667	1	1	1	1	1	1	1	1	1	1	1	1	1	1	1	1	1	1
	S	1	0.666667	0.666667	1	0.666667	0.666667	1	0.666667	0.666667	1	1	1	1	1	1	1	1	1	1	1	1	1	1	1	1	1	1
	T	0	0	0	0	0	0	0	0	0	1	1	1	1	1	1	1	1	1	0	0	0	0	0	0	0	0	0
	Z	1	0.666667	0.666667	1	0.666667	0.666667	1	0.666667	0.666667	1	1	1	1	1	1	1	1	1	1	1	1	1	1	1	1	1	1
	TOTAL	0.717949	0.538462	0.538462	0.717949	0.538462	0.538462	0.717949	0.538462	0.538462	0.769231	1	0.923077	0.769231	1	0.923077	0.846154	1	1	0.666667	0.74359	0.74359	0.74359	0.74359	0.74359	0.74359	0.74359	0.74359
	expected	3	3	3	3	3	3	3	3	3	1	1	1	1	1	1	1	1	1	3	3	3	3	3	3	3	3	3
02% freq mutations
	Lab	1BE	1BF	1BG	1CE	1CF	1CG	1DE	1DF	1DG	2BE	2BF	2BG	2CE	2CF	2CG	2DE	2DF	2DG
	A	1	1	1	1	1	1	1	1	1	1	1	1	1	1	1	1	1	1
	B	1	1	1	1	1	1	1	1	1	1	1	1	1	1	1	1	1	1
	C	0.5	0.5	0.5	0.5	0.5	0.5	0.5	0.5	0.5	1	1	0	1	1	1	1	1	1
	D	1	1	1	1	1	1	1	1	1	1	1	1	0	1	1	1	1	1
	G	0	0	0	0	0	0	0	0	0	0	1	1	0	1	1	0	1	1
	H	1	1	0.5	1	1	1	1	1	1	0	1	1	1	1	1	1	1	1
	O	1	1	1	1	1	1	1	1	1	1	1	1	1	1	1	1	1	1
	R	1	1	1	1	1	1	1	1	1	1	1	1	1	1	1	1	1	1
	S	1	1	1	1	1	1	1	1	1	1	1	1	1	1	1	1	1	1
	Z	0	0	0	0	0	0	0	0	0	1	1	1	1	1	1	1	1	1
	TOTAL	0.75	0.75	0.7	0.75	0.75	0.75	0.75	0.75	0.75	0.8	1	0.9	0.8	1	1	0.9	1	1
	expected	2	2	2	2	2	2	2	2	2	1	1	1	1	1	1	1	1	1
01% freq mutations
	Lab	1BE	1BF	1BG	1CE	1CF	1CG	1DE	1DF	1DG	2BE	2BF	2BG	2CE	2CF	2CG	2DE	2DF	2DG	3BE	3BF	3BG	3CE	3CF	3CG	3DE	3DF	3DG
	A	0.666667	0.666667	0.666667	0.666667	0.666667	0.666667	0.666667	0.666667	0.666667	1	1	1	1	1	1	1	1	1	0.666667	0.666667	0.666667	0.666667	0.666667	0.666667	0.666667	0.666667	0.666667
	B	0.666667	0.666667	0.666667	0.333333	0.333333	0.333333	0.333333	0.333333	0.333333	1	1	1	1	1	1	1	1	1	0.666667	0.666667	0.666667	0.666667	0.666667	0.666667	0.666667	0.666667	0.666667
	C	0.333333	0.333333	0.333333	0.333333	0.333333	0.333333	0.333333	0.333333	0.333333	1	1	0	1	1	1	1	1	1	0.666667	0.666667	0.666667	0.666667	0.666667	0.666667	0.666667	0.666667	0.666667
	D	0.333333	0.333333	0.333333	0.333333	0.333333	0.333333	0.333333	0.333333	0.333333	1	1	1	0	1	1	1	1	1	0.666667	0.666667	0.666667	0.666667	0.666667	0.666667	0.666667	0.666667	0.666667
	H	1	1	0.666667	1	1	0.666667	1	1	0.666667	0	0	0	1	0	0	1	0	0	0	0.333333	0.333333	0.333333	0.333333	0.333333	0.333333	0.333333	0.333333
	O	0.666667	0.666667	0.666667	0.666667	0.666667	0.666667	0.666667	0.666667	0.666667	1	1	1	1	1	1	1	1	1	0.666667	0.666667	0.666667	0.666667	0.666667	0.666667	0.666667	0.666667	0.666667
	R	1	1	0.666667	1	1	1	1	1	1	1	1	1	1	1	1	1	1	1	0.666667	0.666667	0.666667	0.666667	0.666667	0.666667	0.666667	0.666667	0.666667
	S	0.666667	0.666667	0.666667	0.666667	0.666667	0.666667	0.666667	0.666667	0.666667	1	1	1	1	1	1	1	1	1	0.666667	0.666667	0.666667	0.666667	0.666667	0.666667	0.666667	0.666667	0.666667
	TOTAL	0.666667	0.666667	0.583333	0.625	0.625	0.583333	0.625	0.625	0.583333	0.875	0.875	0.75	0.875	0.875	0.875	1	0.875	0.875	0.583333	0.625	0.625	0.625	0.625	0.625	0.625	0.625	0.625
	expected	3	3	3	3	3	3	3	3	3	1	1	1	1	1	1	1	1	1	3	3	3	3	3	3	3	3	3

## Sheet: Frequencies_data
60% freq mutations
	Lab	1BE	1BF	1BG	1CE	1CF	1CG	1DE	1DF	1DG	2BE	2BF	2BG	2CE	2CF	2CG	2DE	2DF	2DG
	A	3	3	3	3	2	2	3	2	2	1	1	1	1	1	1	1	1	1
	B	3	3	3	2	2	2	2	2	2	1	1	1	1	1	1	1	1	1
	C	1	1	1	1	1	1	1	1	1	1	1	1	1	1	1	1	1	1
	D	3	3	3	3	3	3	3	3	3	1	1	1	1	1	1	1	1	1
	G	3	3	3	3	2	2	3	2	2	1	1	1	1	1	1	1	1	1
	H	3	3	3	3	3	3	3	3	3	1	1	1	1	1	1	1	1	1
	O	3	3	3	3	3	3	3	3	3	1	1	1	1	1	1	1	1	1
	P	3	3	3	3	2	2	3	2	2	1	1	1	1	1	1	1	1	1
	Q	3	3	3	3	3	3	3	3	3	1	1	1	1	1	1	1	1	1
	R	3	3	3	3	3	2	3	2	2	1	1	1	1	1	1	1	1	1
	S	3	3	3	3	2	2	3	2	2	1	1	1	1	1	1	1	1	1
	T	3	3	3	3	2	2	3	2	2	1	1	1	1	1	1	1	1	1
	Y	3	3	3	3	3	3	3	3	3	1	1	1	1	1	1	1	1	1
	Z	3	3	3	3	3	3	3	3	3	1	1	1	1	1	1	1	1	1
	expected	3	3	3	3	3	3	3	3	3	1	1	1	1	1	1	1	1	1
20% freq mutations
	Lab	1BE	1BF	1BG	1CE	1CF	1CG	1DE	1DF	1DG	2BE	2BF	2BG	2CE	2CF	2CG	2DE	2DF	2DG	3BE	3BF	3BG	3CE	3CF	3CG	3DE	3DF	3DG
	A	3	3	3	3	3	3	3	3	3	1	1	1	1	1	1	1	1	1	3	3	3	3	3	3	3	3	3
	B	3	3	3	3	3	3	3	3	3	1	1	1	1	1	1	1	1	1	3	3	3	3	3	3	3	3	3
	C	1	1	1	1	1	1	1	1	1	1	1	1	1	1	1	1	1	1	3	3	3	3	3	3	3	3	3
	D	3	3	3	3	3	3	3	3	3	1	1	1		1	1	1	1	1	3	3	3	3	3	3	3	3	3
	G	3	3	3	3	3	3	3	3	3	1	1	1	1	1	1	1	1	1	3	3	3	3	3	3	3	3	3
	H	3	3	3	3	3	3	3	3	3		1	1	1	1	1	1	1	1		3	3	3	3	3	3	3	3
	O	3	3	3	3	3	3	3	3	3	1	1	1	1	1	1	1	1	1	3	3	3	3	3	3	3	3	3
	P	3	3	3	3	3	3	3	3	3	1	1	1	1	1	1	1	1	1	3	3	3	3	3	3	3	3	3
	Q	3	3	3	3	3	3	3	3	3	1	1	1	1	1	1	1	1	1	3	3	3	3	3	3	3	3	3
	R	3	3	3	3	3	3	3	3	3	1	1	1	1	1	1	1	1	1	3	3	3	3	3	3	3	3	3
	S	3	3	3	3	3	3	3	3	3	1	1	1	1	1	1	1	1	1	3	3	3	3	3	3	3	3	3
	T	3	3	3	3	3	3	3	3	3	1	1	1	1	1	1	1	1	1	3	3	3	3	3	3	3	3	3
	Y										1	1	1	1	1	1	1	1	1
	Z	3	3	3	3	3	3	3	3	3	1	1	1	1	1	1	1	1	1	3	3	3	3	3	3	3	3	3
	expected	3	3	3	3	3	3	3	3	3	1	1	1	1	1	1	1	1	1	3	3	3	3	3	3	3	3	3
12% freq mutations
	Lab	3BE	3BF	3BG	3CE	3CF	3CG	3DE	3DF	3DG
	A	2	2	2	2	1	1	2	1	1
	B	2	2	2	1	1	1	2	2	2
	C	2	2	2	2	1	1	2	1	1
	D	2	2	2	2	2	2	2	2	2
	G	2	2	2	2	1	1	2	1	1
	H		2	2	2	2	2	2	2	2
	O	2	2	2	1	1	1	2	2	2
	R	2	2	2	2	1	1	2	1	1
	S	2	2	2	2	1	1	2	1	1
	T	2	2	2	2	1	1	2	1	1
	Z	2	2	2	2	2	2	2	2	2
	expected	2	2	2	2	2	2	2	2	2
10% freq mutations
	Lab	1BE	1BF	1BG	1CE	1CF	1CG	1DE	1DF	1DG	2BE	2BF	2BG	2CE	2CF	2CG	2DE	2DF	2DG
	A	3	3	3	3	3	3	3	3	3	1	1	1	1	1	1	1	1	1
	B	3	3	3	3	3	3	3	3	3	1	1	1	1	1	1	1	1	1
	C	1	1	1	1	1	1	1	1	1	1	1	1	1	1	1	1	1	1
	D	3	3	3	3	3	3	3	3	3	1	1	1		1	1	1	1	1
	G	3	3	3	3	3	3	3	3	3	1	1	1	1	1	1	1	1	1
	H	3	3	2	3	3	3	3	3	3		1	1	1	1	1	1	1	1
	O	3	3	3	3	3	3	3	3	3	1	1	1	1	1	1	1	1	1
	P										1	1	1	1	1	1	1	1	1
	Q										1	1	1	1	1	1	1	1	1
	R	3	3	3	3	3	3	3	3	3	1	1	1	1	1	1	1	1	1
	S	3	3	3	3	3	3	3	3	3	1	1	1	1	1	1	1	1	1
	T	2	3	3	1	1	1	1	1	1	1	1	1	1	1	1	1	1	1
	Z	3	3	3	3	3	3	3	3	3	1	1	1	1	1	1	1	1	1
	expected	3	3	3	3	3	3	3	3	3	1	1	1	1	1	1	1	1	1
06% freq mutations
	Lab	1BE	1BF	1BG	1CE	1CF	1CG	1DE	1DF	1DG	2BE	2BF	2BG	2CE	2CF	2CG	2DE	2DF	2DG	3BE	3BF	3BG	3CE	3CF	3CG	3DE	3DF	3DG
	A	3	2	2	3	2	2	3	2	2	1	1	1	1	1	1	1	1	1	3	3	3	3	3	3	3	3	3
	B	3	2	2	3	2	2	3	2	2	1	1	1	1	1	1	1	1	1	3	3	3	3	3	3	3	3	3
	C	1	1	1	1	1	1	1	1	1	1	1		1	1	1	1	1	1	2	2	2	2	2	2	2	2	2
	D	3	2	2	3	2	2	3	2	2	1	1	1		1	1	1	1	1	3	3	3	3	3	3	3	3	3
	G	3	3	3	3	3	3	3	3	3	1	1	1	1	1	1	1	1	1	3	3	3	3	3	3	3	3	3
	H	3	3	3	3	3	3	3	3	3		1	1	1	1		1	1	1		3	3	3	3	3	3	3	3
	O	3	2	2	3	2	2	3	2	2	1	1	1	1	1	1	1	1	1	3	3	3	3	3	3	3	3	3
	P											1	1		1	1		1	1
	Q											1	1		1	1		1	1
	R	3	2	2	3	2	2	3	2	2	1	1	1	1	1	1	1	1	1	3	3	3	3	3	3	3	3	3
	S	3	2	2	3	2	2	3	2	2	1	1	1	1	1	1	1	1	1	3	3	3	3	3	3	3	3	3
	T										1	1	1	1	1	1	1	1	1
	Z	3	2	2	3	2	2	3	2	2	1	1	1	1	1	1	1	1	1	3	3	3	3	3	3	3	3	3
	expected	3	3	3	3	3	3	3	3	3	1	1	1	1	1	1	1	1	1	3	3	3	3	3	3	3	3	3
02% freq mutations
	Lab	1BE	1BF	1BG	1CE	1CF	1CG	1DE	1DF	1DG	2BE	2BF	2BG	2CE	2CF	2CG	2DE	2DF	2DG
	A	2	2	2	2	2	2	2	2	2	1	1	1	1	1	1	1	1	1
	B	2	2	2	2	2	2	2	2	2	1	1	1	1	1	1	1	1	1
	C	1	1	1	1	1	1	1	1	1	1	1		1	1	1	1	1	1
	D	2	2	2	2	2	2	2	2	2	1	1	1		1	1	1	1	1
	G											1	1		1	1		1	1
	H	2	2	1	2	2	2	2	2	2		1	1	1	1	1	1	1	1
	O	2	2	2	2	2	2	2	2	2	1	1	1	1	1	1	1	1	1
	R	2	2	2	2	2	2	2	2	2	1	1	1	1	1	1	1	1	1
	S	2	2	2	2	2	2	2	2	2	1	1	1	1	1	1	1	1	1
	Z										1	1	1	1	1	1	1	1	1
	expected	2	2	2	2	2	2	2	2	2	1	1	1	1	1	1	1	1	1
01% freq mutations
	Lab	1BE	1BF	1BG	1CE	1CF	1CG	1DE	1DF	1DG	2BE	2BF	2BG	2CE	2CF	2CG	2DE	2DF	2DG	3BE	3BF	3BG	3CE	3CF	3CG	3DE	3DF	3DG
	A	2	2	2	2	2	2	2	2	2	1	1	1	1	1	1	1	1	1	2	2	2	2	2	2	2	2	2
	B	2	2	2	1	1	1	1	1	1	1	1	1	1	1	1	1	1	1	2	2	2	2	2	2	2	2	2
	C	1	1	1	1	1	1	1	1	1	1	1		1	1	1	1	1	1	2	2	2	2	2	2	2	2	2
	D	1	1	1	1	1	1	1	1	1	1	1	1		1	1	1	1	1	2	2	2	2	2	2	2	2	2
	H	3	3	2	3	3	2	3	3	2				1			1				1	1	1	1	1	1	1	1
	O	2	2	2	2	2	2	2	2	2	1	1	1	1	1	1	1	1	1	2	2	2	2	2	2	2	2	2
	R	3	3	2	3	3	3	3	3	3	1	1	1	1	1	1	1	1	1	2	2	2	2	2	2	2	2	2
	S	2	2	2	2	2	2	2	2	2	1	1	1	1	1	1	1	1	1	2	2	2	2	2	2	2	2	2
	expected	3	3	3	3	3	3	3	3	3	1	1	1	1	1	1	1	1	1	3	3	3	3	3	3	3	3	3
