# Supplementary material for: Detection of single nucleotide polymorphisms in virus genomes assembled from high-throughput sequencing data: large-scale performance testing of sequence analysis strategies
Source: PeerJ. 2023 Aug 16;11:e15816. doi: 10.7717/peerj.15816 (PMC10439718; doi:10.7717/peerj.15816)
Supplement: Supplemental Information 6 [file peerj-11-15816-s006.xlsx]

## Sheet: Sheet1
	A							B
	Software prediction	TP %	FP %	True positive rate	False negative rate	average NB of Snps predicted		Manual validation	TPmv %	FPmv %	TNmv %	FNmv %	True positive rate	False negative rate
	A	0.799207	0.200793	0.673862	0.326138	22		A	0.703599	0.0307734	0.17002	0.0956077	0.915456	0.0845442
	B	0.829414	0.170586	0.668905	0.331095	16		B	0.817675	0.0603242	0.110262	0.0117389	0.985714	0.0142857
	C	0.653066	0.346934	0.547642	0.452358	20		C	0.637407	0.300491	0.0252525	0.03685	0.941505	0.058495
	D	0.716437	0.283563	0.656424	0.343576	27		D	0.447648	0.031746	0.251817	0.268789	0.683333	0.316667
	G	0.87208	0.12792	0.500882	0.499118	11		H	0.630527	0.210302	0.159171	0	1	0
	H	0.63026	0.36974	0.622523	0.377477	20		O	0.335777	0.0088773	0.131597	0.523749	0.425903	0.574097
	O	0.859525	0.140475	0.685999	0.314001	22		P	0.913735	0	0.086265	0	1	0
	P	0.913735	0.086265	0.278456	0.721544	6		R	0.673	0.0435225	0.28228	0.00119793	0.996296	0.0037037
	Q	0.481135	0.518865	0.284154	0.715846	10		S	0.779584	0.0311318	0.189285	0	1	0
	R	0.673485	0.326515	0.737485	0.262515	34		T	0.883454	0.00707071	0.109476	0	1	0
	S	0.779584	0.220416	0.677656	0.322344	19		Z	0.747798	0.0182811	0.190332	0.0435897	0.952581	0.0474186
	T	0.883454	0.116546	0.347782	0.652218	7		Average	0.6882	0.0675018	0.155069	0.0892292	0.900072	0.0999283
	Y	0.604938	0.395062	0.112536	0.887464	2
	Z	0.791387	0.208613	0.520961	0.479039	12
	Average	0.749122	0.250878	0.522519	0.477481	16.2857
	C							D
	Software prediction	TP %	FP %	True positive rate	False negative rate	average NB of Snps predicted		Manual validation	TPmv %	FPmv %	TNmv %	FNmv %	True positive rate	False negative rate
	A	0.786871	0.213129	0.914835	0.0851654	22		A	0.687723	0.0319132	0.181216	0.0991487	0.895694	0.104306
	B	0.827208	0.172792	0.900772	0.0992276	16		B	0.815459	0.0603242	0.112468	0.0117497	0.982716	0.017284
	C	0.814947	0.185053	0.676471	0.323529	15		C	0.803674	0.134223	0.0252525	0.03685	0.941505	0.058495
	D	0.712224	0.287776	0.886545	0.113455	27		D	0.443435	0.0308642	0.256912	0.268789	0.683069	0.316931
	G	0.87208	0.12792	0.714795	0.285205	11		H	0.693029	0.137906	0.169065	0	1	0
	H	0.692763	0.307237	0.814274	0.185726	17		O	0.357863	0.00912023	0.134416	0.498601	0.439815	0.560185
	O	0.856464	0.143536	0.926916	0.0730838	22		P	0.913735	0	0.086265	0	1	0
	P	0.913735	0.086265	0.403545	0.596455	6		R	0.789934	0.0378214	0.172245	0	1	0
	Q	0.481135	0.518865	0.41226	0.58774	10		S	0.773494	0.0311318	0.195374	0	1	0
	R	0.789079	0.210921	0.917013	0.0829867	18		T	0.883454	0.00707071	0.109476	0	1	0
	S	0.773494	0.226506	0.914835	0.0851654	19		Z	0.747798	0.0182811	0.190332	0.0435897	0.952581	0.0474186
	T	0.883454	0.116546	0.499703	0.500297	7		Average	0.719054	0.0453323	0.148456	0.0871571	0.89958	0.10042
	Y	0.604938	0.395062	0.169935	0.830065	2
	Z	0.791387	0.208613	0.742424	0.257576	12
	Average	0.771413	0.228587	0.706737	0.293263	10
		A- Variant calling prediction depending on pipeline
		B- Manual validation of the variant calling depending on pipeline
		C- Variant calling prediction depending on pipeline (only SNP > 1% frequencies are considered)
		D- Manual validation of the variant calling depending on pipeline (only SNP > 1% frequencies are considered)
